# Supplementary material for: Benzyl anion transfer in the fragmentation of N-(phenylsulfonyl)-benzeneacetamides: a gas-phase intramolecular SNAr reaction
Source: Royal Society of Chemistry journal article supplement (doi:10.1039/c5ob01582k), 2015-01-01

---

# Organic & Biomolecular Chemistry

---

## **Benzyl Anion Transfer in the Fragmentation of *N*-(phenylsulfonyl)-benzeneacetamides: A Gas-phase Intramolecular S<sub>N</sub>Ar Reaction**

Shanshan Shen,<sup>a</sup> Yunfeng Chai,<sup>b</sup> Yaqin Liu,<sup>a</sup> Chang Li,<sup>b</sup> Yuanjiang Pan<sup>\*,a</sup>

<sup>a</sup> Department of Chemistry, Zhejiang University, Hangzhou 310027, China

<sup>b</sup> College of Pharmaceutical Sciences, Zhejiang University, Hangzhou 310058, China

**Address reprint requests to: Yuanjiang Pan**

**Department of Chemistry, Zhejiang University, 38 Zheda Road, Hangzhou, 310027, China.**

**Tel: +86-571-87951264; Fax: +86-571-87951629.**

**E-mail address: [panyuanjiang@zju.edu.cn](mailto:panyuanjiang@zju.edu.cn)**

## Section I Synthesis Procedures

## Section II Figure Legends

**Table S1.** Accurate masses of selected ions derived from deprotonated **compounds 1-12**

**Figure S1.** The CID MS spectra of  $[M-H]^-$  of **compounds 2-7**

**Figure S2.** Figures, cartesian coordinates, total energies, zero point energy corrections of all optimized structures discussed in the text and charge distribution of **A-1** at the B3LYP/6-31++G (*d, p*) level

**Figure S3.** DFT potential energy surfaces for PT of different sites (**compound 1** as the model)

**Figure S4.** Calculated potential energy diagram for the conversion of **INC-1** to **E.o** at the B3LYP/6-31++G(*d,p*) level. The relative energy of  $[1 - H]^-$  is zero

**Figure S5.**  $^1\text{H}$  NMR,  $^{13}\text{C}$  NMR spectra of *N*-(phenylsulfonyl)-benzeneacetamide (solvent: *d*<sub>6</sub>-DMSO),  $^1\text{H}$  NMR spectra of other compounds

## Section I Synthesis Procedures

### 1.1 General procedure for synthesis of **compounds 1-7**

A solution of corresponding phenylacetic acids (2 mmol), benzenesulfonamide (2 mmol), 4-dimethylaminopyridine (DMAP, 4 mmol), and 1-[3-(dimethylamino)-propyl]-3-ethylcarbodiimide-hydrochloride (EDCI, 4 mmol) in CH<sub>2</sub>Cl<sub>2</sub> (10 mL) was stirred at room temperature for 12 h. Then the resulting mixture was cooled to 5 °C, and acidified to pH 1 with addition of HCl aqueous solution (10%), which was followed by extraction with CH<sub>2</sub>Cl<sub>2</sub> (3 × 10 mL). The combined organic layers were washed with H<sub>2</sub>O and brine, dried over Na<sub>2</sub>SO<sub>4</sub>, and evaporated in *vacuo*. The residue was subjected to silica gel chromatography (PE/EtOAc=3:1) to afford the compounds.

#### 1.1.1 2-(4-methoxyphenyl)-N-(phenylsulfonyl)acetamide (**2**)

Pale yellow solid; yield: 73%. <sup>1</sup>H NMR (500 MHz, Acetone-*d*<sub>6</sub>): δ (ppm) 8.00 (t, 2H), 7.69 (t, 1H), 7.58 (t, 2H), 7.11 (d, 2H), 6.82 (t, 2H), 3.74 (s, 3H), 3.58 (s, 2H).

#### 1.1.2 N-(phenylsulfonyl)-2-(*p*-tolyl)acetamide (**3**)

**White** solid; yield: 75%. <sup>1</sup>H NMR (400 MHz, Acetone-*d*<sub>6</sub>): δ (ppm) 8.01 (t, 2H), 7.67 (t, 1H), 7.57 (t, 2H), 7.07 (s, 4H), 3.60 (s, 2H), 2.26 (s, 3H).

#### 1.1.3 2-(4-fluorophenyl)-N-(phenylsulfonyl)acetamide (**4**)

White solid; yield: 68%. <sup>1</sup>H NMR (500 MHz, Acetone-*d*<sub>6</sub>): δ (ppm) 7.96 (t, 2H), 7.63 (t, 1H), 7.54 (t, 2H), 7.25-7.22 (m, 2H), 7.02-6.99 (m, 2H), 3.59 (s, 2H).

#### 1.1.4 2-(4-chlorophenyl)-N-(phenylsulfonyl)acetamide (**5**)

White solid; yield: 72%. <sup>1</sup>H NMR (500 MHz, Acetone-*d*<sub>6</sub>): δ (ppm) 7.91 (d, 2H), 7.60-7.55 (m, 3H), 7.35 (s, 4H), 3.65 (s, 2H).

### 1.1.5 2-(4-bromophenyl)-N-(phenylsulfonyl)acetamide (**6**)

White solid; yield: 71%. <sup>1</sup>H NMR (500 MHz, Acetone-*d*<sub>6</sub>): δ (ppm) 8.00 (d, 2H), 7.69 (t, 1H), 7.58 (t, 2H), 7.44(d, 2H), 7.15(d, 2H), 3.66 (s, 2H).

### 1.1.6 methyl 4-(2-oxo-2-(phenylsulfonylamido)ethyl)benzoate (**7**)

White solid; yield: 68%. <sup>1</sup>H NMR (500 MHz, Acetone-*d*<sub>6</sub>): δ (ppm) 8.01 (d, 2H), 7.91 (d, 2H), 7.70 (t, 1H), 7.59 (m, 2H), 7.34(d, 2H), 3.86(s, 3H), 3.78 (s, 2H).

## 1.2 Procedure for synthesis of **compound 8**

Further deuteration was achieved by dissolving **compound 1** (1 mmol) in 5 mL CD<sub>3</sub>OD, then stirring with 40% NaOD in D<sub>2</sub>O (0.5 mL) for 1 day at room temperature. More than 99% deuteration has been achieved by the repetition of the forgoing procedure. After adding 20 % DCl in D<sub>2</sub>O (1 mL), the mixture was stirred for another 30 min, and evaporated in *vacuo* to afford **compound 8**.

### 1.2.1 N-(phenylsulfonyl)-α,α-d<sub>2</sub>-benzeneacetamide (**8**)

Pale yellow solid. <sup>1</sup>H NMR (500 MHz, Acetone-*d*<sub>6</sub>): δ (ppm) 7.98 (d, 2H), 7.64 (t, 1H), 7.54 (t, 2H), 7.23-7.16 (m, 5H).

## 1.3 General procedure for synthesis of **compounds 9-11**

To a round-bottom flask (25 mL) were added NaH (120 mg, 3 mmol, 60%), THF (10 mL) and 2-phenylacetamide (2 mmol). The solution mixture was allowed to stir at room temperature for 1 h. After stirring, the corresponding benzenesulfonyl chlorides (2 mmol) was added into the solution mixture and then heated to 70 °C for 1 day. After reaction, the mixture was diluted with EtOAc, extracted by EtOAc/H<sub>2</sub>O and then collected the organic layer. The residue was then dried over the Na<sub>2</sub>SO<sub>4</sub> and concentrated in *vacuo*. Purification through silica gel chromatography (PE/EtOAc=3:1) afforded the corresponding products.

### 1.3.1 2-phenyl-N-tosylacetamide (**9**)

White solid; yield: 65%. <sup>1</sup>H NMR (500 MHz, Acetone-*d*<sub>6</sub>): δ (ppm) 7.88 (d, 2H), 7.38 (d, 1H), 7.28-7.19 (m, 5H), 3.64 (s, 2H), 2.40 (s, 3H).

### 1.3.2 *N*-((2,6-dichlorophenyl)sulfonyl)-2-phenylacetamide (**10**)

White solid; yield: 61%. <sup>1</sup>H NMR (500 MHz, Acetone-*d*<sub>6</sub>): δ (ppm) 7.59-7.54 (m, 3H), 7.32-7.23 (m, 5H), 3.73 (s, 2H).

### 1.3.3 *N*-(mesitylsulfonyl)-2-phenylacetamide (**11**)

White solid; yield: 68%. <sup>1</sup>H NMR (500 MHz, Acetone-*d*<sub>6</sub>): δ (ppm) 7.28-7.19 (m, 5H), 6.99 (s, 2H), 3.66 (s, 2H), 2.62 (s, 6H), 2.26 (s, 3H).

## 1.4 Procedure for synthesis of **compound 12**

To a solution of 2-benzylaniline (500 mg, 2.7 mmol) in H<sub>2</sub>O (7.3 mL) at 0 °C was added concentrated HCl (0.4 mL). A cold solution of NaNO<sub>2</sub> (188 mg, 2.7 mmol) in H<sub>2</sub>O (1.5 mL) was added slowly and stirred for 15 min. The cold diazonium solution was added slowly to a solution of potassium ethyl xanthate (525 mg, 3.3 mmol) in H<sub>2</sub>O (0.65 mL) at 45 °C. The reaction mixture was stirred for an additional 30 min at 45 °C and then cooled to room temperature. The reaction mixture was extracted with Et<sub>2</sub>O (3 × 50 mL). The combined organic extracts were washed with 10% NaOH solution (100 mL), H<sub>2</sub>O (3 × 50 mL), brine (50 mL), dried over Na<sub>2</sub>SO<sub>4</sub>, filtered and evaporated in *vacuo*. The resulting crude crude compound was dissolved in ethanol (8 mL) and heated to reflux. KOH (654 mg, 11.6 mmol) were added and refluxing continued overnight. The solution was cooled to room temperature and the ethanol was evaporated in *vacuo*. The residue was dissolved in water and washed with Et<sub>2</sub>O (100 mL). The aqueous layer was acidified with 2 N HCl and extracted with Et<sub>2</sub>O (3 × 50 mL). The organic extracts were washed with H<sub>2</sub>O (50 mL), brine (50 mL), dried over Na<sub>2</sub>SO<sub>4</sub>, filtered and evaporated in *vacuo*. The residue was subjected to silica gel

chromatography (PE) to afford the compound (2-benzylbenzenethiol).

The crude 2-benzylbenzenethiol was dissolved in a mixture of 12 mL of 2.5% aqueous NaOH and 12 mL of ethanol. Aqueous H<sub>2</sub>O<sub>2</sub> (30%, 0.6 mL) was added to the solution with stirring at room temperature. The reaction was monitored by TLC. After the reaction was complete, the solvent was evaporated off in *vacuo*. The residue was dissolved in H<sub>2</sub>O and acidified by the addition of diluted HCl at 0 °C. The solution was extracted with Et<sub>2</sub>O, and dried over Na<sub>2</sub>SO<sub>4</sub>. Then the Et<sub>2</sub>O was removed to give 2-benzylbenzenesulfinic acid.

#### 1.4.1 *2-benzylbenzenethiol*

White solid; yield: 23%. <sup>1</sup>H NMR (500 MHz, CDCl<sub>3</sub>): δ (ppm) 7.28-7.25 (t, 3H), 7.20-7.14 (m, 3H), 7.11-7.05 (m, 3H), 4.03 (s, 2H), 3.25 (s, 1H).

#### 1.4.2 *2-benzylbenzenesulfinic acid*

Pale yellow solid. <sup>1</sup>H NMR (500 MHz, CDCl<sub>3</sub>): δ (ppm) 7.98 (br, 1H), 7.52 (dd, 1H, J = 7.5, 1.5 Hz), 7.34 (t, 1H), 7.24-7.28 (m, 2H), 7.17-7.21 (m, 2H), 7.12-7.14 (m, 3H), 4.12 (s, 2H).

**Table S1.** Accurate masses of selected ions derived from deprotonated **compounds 1 to 12**

| Compound  | Nominal<br><i>m/z</i> | Elemental<br>composition                                                       | Accurate<br>mass | Observed<br>mass | Relative error<br>(ppm) |
|-----------|-----------------------|--------------------------------------------------------------------------------|------------------|------------------|-------------------------|
| <b>1</b>  | 274                   | C <sub>14</sub> H <sub>12</sub> NO <sub>3</sub> S <sup>-</sup>                 | 274.0543         | 274.0543         | 0                       |
|           | 256                   | C <sub>14</sub> H <sub>10</sub> NO <sub>2</sub> S <sup>-</sup>                 | 256.0438         | 256.0430         | -3.1                    |
|           | 231                   | C <sub>13</sub> H <sub>11</sub> O <sub>2</sub> S <sup>-</sup>                  | 231.0485         | 231.0482         | -1.3                    |
|           | 182                   | C <sub>7</sub> H <sub>4</sub> NO <sub>3</sub> S <sup>-</sup>                   | 181.9917         | 181.9915         | -1.1                    |
|           | 156                   | C <sub>6</sub> H <sub>6</sub> NO <sub>2</sub> S <sup>-</sup>                   | 156.0125         | 156.0127         | 1.3                     |
|           | 93                    | C <sub>6</sub> H <sub>5</sub> O <sup>-</sup>                                   | 93.0346          | 93.0345          | -1.1                    |
|           | 91                    | C <sub>7</sub> H <sub>7</sub> <sup>-</sup>                                     | 91.0553          | 91.0552          | -1.1                    |
| <b>2</b>  | 304                   | C <sub>15</sub> H <sub>14</sub> NO <sub>4</sub> S <sup>-</sup>                 | 304.0649         | 304.0643         | -2.0                    |
| <b>3</b>  | 288                   | C <sub>15</sub> H <sub>14</sub> NO <sub>3</sub> S <sup>-</sup>                 | 288.0700         | 288.0707         | 2.4                     |
| <b>4</b>  | 292                   | C <sub>14</sub> H <sub>11</sub> FNO <sub>3</sub> S <sup>-</sup>                | 292.0449         | 292.0445         | -1.4                    |
| <b>5</b>  | 308                   | C <sub>14</sub> H <sub>11</sub> ClNO <sub>3</sub> S <sup>-</sup>               | 308.0154         | 308.0162         | 2.6                     |
| <b>6</b>  | 352                   | C <sub>14</sub> H <sub>11</sub> BrNO <sub>3</sub> S <sup>-</sup>               | 351.9649         | 351.9655         | 1.7                     |
| <b>7</b>  | 332                   | C <sub>16</sub> H <sub>14</sub> NO <sub>5</sub> S <sup>-</sup>                 | 332.0598         | 332.0595         | -0.9                    |
| <b>8</b>  | 276                   | C <sub>14</sub> H <sub>10</sub> D <sub>2</sub> NO <sub>3</sub> S <sup>-</sup>  | 276.0669         | 276.0666         | -1.1                    |
| <b>9</b>  | 288                   | C <sub>15</sub> H <sub>14</sub> NO <sub>3</sub> S <sup>-</sup>                 | 288.0700         | 288.0702         | 0.7                     |
| <b>10</b> | 342                   | C <sub>14</sub> H <sub>10</sub> Cl <sub>2</sub> NO <sub>3</sub> S <sup>-</sup> | 341.9764         | 341.9766         | 0.6                     |
| <b>11</b> | 316                   | C <sub>17</sub> H <sub>18</sub> NO <sub>3</sub> S <sup>-</sup>                 | 316.1013         | 316.1013         | 0                       |
| <b>12</b> | 231                   | C <sub>13</sub> H <sub>11</sub> O <sub>2</sub> S <sup>-</sup>                  | 231.0485         | 231.0482         | -1.3                    |

**Figure S1.** The CID MS spectra of  $[M-H]^-$  of **compounds 2-7**

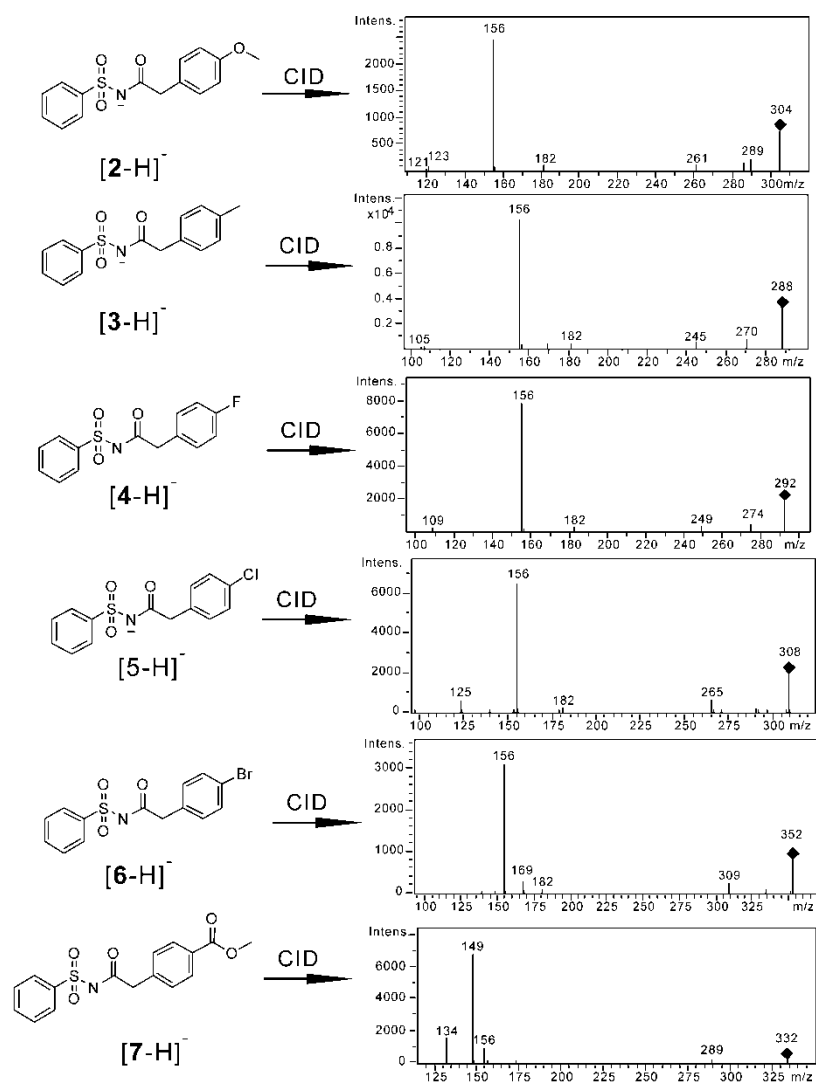



**Figure S2.** Figures, cartesian coordinates, total energies, zero point energy corrections of all optimized structures discussed in the text and charge distribution of **A-1** at the B3LYP/6-31++G (*d, p*) level

**A-1**

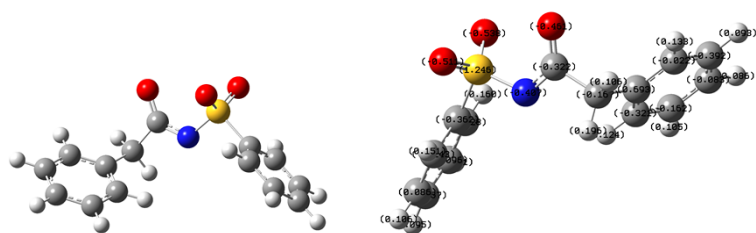


---

| Center Number | Atomic Number | Forces (Hartrees/Bohr) |              |              |
|---------------|---------------|------------------------|--------------|--------------|
|               |               | X                      | Y            | Z            |
| 1             | 6             | 0.000006237            | -0.000002039 | -0.000006761 |
| 2             | 6             | 0.000003848            | 0.000002367  | 0.000000488  |
| 3             | 6             | -0.000004177           | 0.000001006  | -0.000000996 |
| 4             | 6             | 0.000002742            | -0.000004584 | -0.000001132 |
| 5             | 6             | 0.000006239            | 0.000000315  | 0.000005950  |
| 6             | 6             | -0.000000752           | 0.000000296  | -0.000000491 |
| 7             | 1             | 0.000003724            | -0.000002406 | -0.000003262 |
| 8             | 1             | -0.000000026           | -0.000001987 | -0.000004554 |

|    |    |              |              |              |
|----|----|--------------|--------------|--------------|
| 9  | 1  | 0.000000220  | 0.000001550  | 0.000003154  |
| 10 | 1  | 0.000004141  | 0.000001564  | 0.000002014  |
| 11 | 1  | 0.000007595  | -0.000000608 | -0.000000470 |
| 12 | 16 | 0.000000978  | -0.000000524 | 0.000001527  |
| 13 | 8  | -0.000005499 | 0.000003081  | 0.000000262  |
| 14 | 8  | -0.000007222 | -0.000002431 | -0.000003237 |
| 15 | 7  | 0.000000201  | -0.000002995 | -0.000000343 |
| 16 | 6  | -0.000004667 | 0.000002102  | -0.000003410 |
| 17 | 8  | -0.000003775 | -0.000001192 | -0.000000132 |
| 18 | 6  | -0.000002342 | -0.000003983 | -0.000002136 |
| 19 | 1  | 0.000001208  | -0.000000884 | -0.000003869 |
| 20 | 1  | -0.000004809 | -0.000001907 | -0.000004138 |
| 21 | 6  | -0.000001635 | 0.000001493  | -0.000002332 |
| 22 | 6  | -0.000000119 | 0.000000022  | 0.000002288  |
| 23 | 6  | -0.000001608 | 0.000000370  | 0.000003078  |
| 24 | 6  | -0.000003227 | 0.000002443  | 0.000002758  |
| 25 | 1  | -0.000004342 | 0.000000043  | -0.000000794 |
| 26 | 6  | 0.000002791  | 0.000000788  | 0.000002940  |
| 27 | 1  | 0.000002316  | -0.000000290 | -0.000000096 |
| 28 | 6  | 0.000000678  | 0.000002013  | 0.000002261  |
| 29 | 1  | -0.000002836 | 0.000001579  | 0.000002703  |
| 30 | 1  | 0.000003255  | 0.000002100  | 0.000003763  |

31            1            0.000000864    0.000002698    0.000004967

-----

Zero-point correction=                    0.232579 (Hartree/Particle)

Thermal correction to Energy=            0.249217

Thermal correction to Enthalpy=         0.250161

Thermal correction to Gibbs Free Energy= 0.182523

Sum of electronic and zero-point Energies= -1219.164467

Sum of electronic and thermal Energies= -1219.147828

Sum of electronic and thermal Enthalpies= -1219.146884

Sum of electronic and thermal Free Energies= -1219.214523

A-2

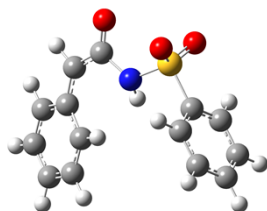

-----

| Center | Atomic | Forces (Hartrees/Bohr) |             |             |
|--------|--------|------------------------|-------------|-------------|
| Number | Number | X                      | Y           | Z           |
| 1      | 6      | -0.000005848           | 0.000001377 | 0.000004510 |
| 2      | 6      | -0.000002862           | 0.000001848 | 0.000002330 |
| 3      | 6      | -0.000000487           | 0.000000689 | 0.000002837 |

-----

|    |    |              |              |              |
|----|----|--------------|--------------|--------------|
| 4  | 6  | -0.000002771 | -0.000001036 | 0.000000505  |
| 5  | 6  | -0.000005310 | 0.000001612  | -0.000000901 |
| 6  | 6  | -0.000003522 | 0.000001798  | 0.000000994  |
| 7  | 1  | -0.000004616 | 0.000000912  | 0.000004449  |
| 8  | 1  | -0.000002068 | 0.000000297  | 0.000003609  |
| 9  | 1  | -0.000002302 | 0.000001157  | -0.000000544 |
| 10 | 1  | -0.000004962 | 0.000002388  | -0.000001429 |
| 11 | 1  | -0.000006622 | 0.000002194  | 0.000001860  |
| 12 | 16 | 0.000003377  | -0.000000099 | 0.000000579  |
| 13 | 8  | -0.000000963 | -0.000000053 | -0.000000015 |
| 14 | 8  | -0.000000015 | -0.000002692 | 0.000003923  |
| 15 | 7  | 0.000001312  | -0.000001245 | 0.000001038  |
| 16 | 1  | 0.000000846  | 0.000000019  | 0.000001021  |
| 17 | 6  | 0.000004915  | -0.000000812 | -0.000000946 |
| 18 | 8  | 0.000004442  | -0.000001799 | -0.000000131 |
| 19 | 6  | 0.000000204  | -0.000002148 | -0.000000219 |
| 20 | 1  | 0.000005262  | -0.000001633 | -0.000001484 |
| 21 | 6  | 0.000005388  | -0.000000076 | -0.000001643 |
| 22 | 6  | -0.000000088 | 0.000000361  | -0.000000191 |
| 23 | 6  | 0.000004046  | -0.000001764 | -0.000002571 |
| 24 | 6  | 0.000000082  | -0.000000606 | -0.000002701 |
| 25 | 1  | 0.000000594  | 0.000000438  | -0.000002080 |

|    |   |              |              |              |
|----|---|--------------|--------------|--------------|
| 26 | 6 | 0.000002373  | -0.000000571 | -0.000000511 |
| 27 | 1 | 0.000005071  | -0.000001777 | -0.000000870 |
| 28 | 6 | 0.000001540  | 0.000000195  | -0.000003992 |
| 29 | 1 | -0.000001144 | 0.000001153  | -0.000002551 |
| 30 | 1 | 0.000003756  | -0.000000898 | -0.000002492 |
| 31 | 1 | 0.000000372  | 0.000000770  | -0.000002385 |

-----

Cartesian Forces: Max      0.000006622 RMS      0.000002495

-----

Internal Coordinate Forces (Hartree/Bohr or radian)

| Cent | Atom | N1 | Length/X      | N2 | Alpha/Y        | N3 | Beta/Z         | J |
|------|------|----|---------------|----|----------------|----|----------------|---|
| 1    | C    |    |               |    |                |    |                |   |
| 2    | C    | 1  | -0.000012( 1) |    |                |    |                |   |
| 3    | C    | 2  | 0.000014( 2)  | 1  | -0.000409( 31) |    |                |   |
| 4    | C    | 3  | -0.000012( 3) | 2  | -0.000059( 32) | 1  | 0.000020( 60)  | 0 |
| 5    | C    | 4  | 0.000002( 4)  | 3  | -0.000035( 33) | 2  | 0.000008( 61)  | 0 |
| 6    | C    | 1  | -0.000010( 5) | 2  | 0.000033( 34)  | 3  | -0.000010( 62) | 0 |
| 7    | H    | 1  | 0.000002( 6)  | 6  | 0.000013( 35)  | 5  | -0.000002( 63) | 0 |
| 8    | H    | 2  | 0.000004( 7)  | 1  | 0.000004( 36)  | 6  | 0.000000( 64)  | 0 |
| 9    | H    | 4  | -0.000002( 8) | 3  | -0.000001( 37) | 2  | -0.000002( 65) | 0 |
| 10   | H    | 5  | -0.000004( 9) | 4  | 0.000008( 38)  | 3  | -0.000004( 66) | 0 |

|    |   |    |                |    |                |    |                |   |
|----|---|----|----------------|----|----------------|----|----------------|---|
| 11 | H | 6  | -0.000002( 10) | 1  | -0.000014( 39) | 2  | 0.000004( 67)  | 0 |
| 12 | S | 3  | -0.000018( 11) | 2  | 0.000275( 40)  | 1  | 0.000482( 68)  | 0 |
| 13 | O | 12 | -0.000001( 12) | 3  | 0.000001( 41)  | 2  | 0.000001( 69)  | 0 |
| 14 | O | 12 | 0.000000( 13)  | 3  | 0.000011( 42)  | 2  | 0.000007( 70)  | 0 |
| 15 | N | 12 | 0.000015( 14)  | 3  | -0.000327( 43) | 2  | 0.000338( 71)  | 0 |
| 16 | H | 15 | -0.000001( 15) | 12 | 0.000001( 44)  | 3  | 0.000000( 72)  | 0 |
| 17 | C | 15 | -0.000017( 16) | 12 | 0.000253( 45)  | 3  | -0.000010( 73) | 0 |
| 18 | O | 17 | -0.000001( 17) | 15 | 0.000003( 46)  | 12 | -0.000009( 74) | 0 |
| 19 | C | 17 | 0.000004( 18)  | 15 | -0.000168( 47) | 12 | 0.000196( 75)  | 0 |
| 20 | H | 19 | -0.000001( 19) | 17 | 0.000004( 48)  | 15 | -0.000010( 76) | 0 |
| 21 | C | 19 | 0.000017( 20)  | 17 | -0.000119( 49) | 15 | 0.000034( 77)  | 0 |
| 22 | C | 21 | 0.000014( 21)  | 19 | -0.000045( 50) | 17 | -0.000008( 78) | 0 |
| 23 | C | 21 | -0.000001( 22) | 19 | 0.000042( 51)  | 17 | -0.000050( 79) | 0 |
| 24 | C | 22 | 0.000006( 23)  | 21 | 0.000047( 52)  | 19 | 0.000004( 80)  | 0 |
| 25 | H | 22 | 0.000001( 24)  | 21 | 0.000004( 53)  | 19 | 0.000000( 81)  | 0 |
| 26 | C | 23 | 0.000003( 25)  | 21 | -0.000014( 54) | 19 | 0.000012( 82)  | 0 |
| 27 | H | 23 | -0.000002( 26) | 21 | 0.000002( 55)  | 19 | -0.000009( 83) | 0 |
| 28 | C | 24 | -0.000003( 27) | 22 | 0.000020( 56)  | 21 | -0.000001( 84) | 0 |
| 29 | H | 24 | 0.000002( 28)  | 22 | -0.000001( 57) | 21 | -0.000003( 85) | 0 |
| 30 | H | 26 | -0.000001( 29) | 23 | 0.000006( 58)  | 21 | -0.000006( 86) | 0 |
| 31 | H | 28 | 0.000001( 30)  | 24 | -0.000005( 59) | 22 | 0.000000( 87)  | 0 |

-----

|                                              |                             |
|----------------------------------------------|-----------------------------|
| Zero-point correction=                       | 0.231600 (Hartree/Particle) |
| Thermal correction to Energy=                | 0.248266                    |
| Thermal correction to Enthalpy=              | 0.249210                    |
| Thermal correction to Gibbs Free Energy=     | 0.184408                    |
| Sum of electronic and zero-point Energies=   | -1219.129812                |
| Sum of electronic and thermal Energies=      | -1219.113147                |
| Sum of electronic and thermal Enthalpies=    | -1219.112202                |
| Sum of electronic and thermal Free Energies= | -1219.177005                |

**C.o**

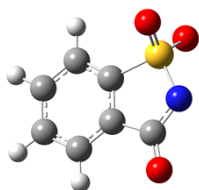


---

| Center | Atomic | Forces (Hartrees/Bohr) |              |              |
|--------|--------|------------------------|--------------|--------------|
| Number | Number | X                      | Y            | Z            |
| 1      | 6      | -0.000007636           | 0.000011732  | 0.000051108  |
| 2      | 6      | -0.000117834           | 0.000037370  | -0.000025818 |
| 3      | 6      | 0.000201002            | 0.000009197  | -0.000010822 |
| 4      | 6      | -0.000111291           | -0.000000362 | 0.000009391  |
| 5      | 6      | 0.000070043            | -0.000018713 | -0.000009390 |

|    |    |              |              |              |
|----|----|--------------|--------------|--------------|
| 6  | 1  | 0.000008931  | 0.000003186  | -0.000011988 |
| 7  | 1  | 0.000021848  | -0.000016851 | 0.000001132  |
| 8  | 1  | 0.000008443  | 0.000005386  | 0.000002819  |
| 9  | 16 | -0.000051795 | -0.000193414 | -0.000003903 |
| 10 | 8  | -0.000056508 | 0.000101387  | 0.000010495  |
| 11 | 8  | -0.000003268 | 0.000034918  | -0.000008584 |
| 12 | 7  | -0.000027963 | 0.000026315  | 0.000298624  |
| 13 | 6  | 0.000002169  | 0.000028048  | -0.000190213 |
| 14 | 8  | 0.000062711  | -0.000019179 | -0.000049266 |
| 15 | 6  | -0.000005101 | -0.000023759 | -0.000071804 |
| 16 | 1  | 0.000006249  | 0.000014737  | 0.000008218  |

-----

|                                              |                             |
|----------------------------------------------|-----------------------------|
| Zero-point correction=                       | 0.102646 (Hartree/Particle) |
| Thermal correction to Energy=                | 0.111684                    |
| Thermal correction to Enthalpy=              | 0.112628                    |
| Thermal correction to Gibbs Free Energy=     | 0.067923                    |
| Sum of electronic and zero-point Energies=   | -947.710419                 |
| Sum of electronic and thermal Energies=      | -947.701381                 |
| Sum of electronic and thermal Enthalpies=    | -947.700436                 |
| Sum of electronic and thermal Free Energies= | -947.745142                 |

**INC-1**



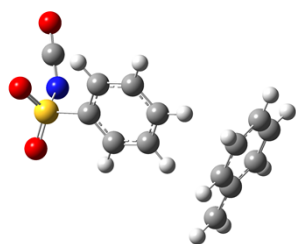


---

| Center | Atomic | Forces (Hartrees/Bohr) |              |              |
|--------|--------|------------------------|--------------|--------------|
| Number | Number | X                      | Y            | Z            |
| 1      | 6      | 0.000000211            | -0.000001662 | -0.000003002 |
| 2      | 6      | 0.000001145            | 0.000003545  | 0.000008275  |
| 3      | 6      | -0.000005723           | -0.000009944 | -0.000017592 |
| 4      | 6      | -0.000000476           | 0.000002537  | 0.000006623  |
| 5      | 6      | -0.000004452           | 0.000010519  | -0.000010262 |
| 6      | 6      | 0.000005512            | -0.000001459 | 0.000000248  |
| 7      | 1      | -0.000000736           | -0.000001624 | -0.000001041 |
| 8      | 1      | -0.000000415           | -0.000003368 | -0.000000345 |
| 9      | 1      | -0.000000932           | -0.000000064 | 0.000000405  |
| 10     | 1      | 0.000001586            | -0.000019619 | 0.000009450  |
| 11     | 1      | -0.000001846           | -0.000000441 | -0.000000785 |
| 12     | 16     | 0.000018215            | -0.000010286 | -0.000008140 |
| 13     | 8      | 0.000000435            | 0.000001080  | 0.000002607  |
| 14     | 8      | -0.000019094           | 0.000014299  | 0.000011858  |
| 15     | 7      | -0.000002373           | -0.000005646 | 0.000002330  |

|    |   |              |              |              |
|----|---|--------------|--------------|--------------|
| 16 | 6 | 0.000003347  | -0.000000508 | -0.000012138 |
| 17 | 8 | -0.000002938 | -0.000004068 | 0.000005772  |
| 18 | 6 | 0.000002543  | 0.000001522  | -0.000001735 |
| 19 | 6 | -0.000000656 | 0.000003885  | 0.000012121  |
| 20 | 6 | 0.000000982  | 0.000003479  | -0.000000250 |
| 21 | 6 | -0.000000357 | 0.000000586  | -0.000000743 |
| 22 | 1 | 0.000001932  | 0.000001447  | -0.000002025 |
| 23 | 6 | 0.000001550  | 0.000000889  | 0.000001068  |
| 24 | 1 | -0.000000894 | 0.000001208  | 0.000000193  |
| 25 | 6 | -0.000000047 | -0.000001946 | -0.000001017 |
| 26 | 1 | 0.000002898  | 0.000000123  | -0.000000121 |
| 27 | 1 | -0.000001101 | 0.000000328  | -0.000000028 |
| 28 | 1 | 0.000000738  | 0.000000981  | 0.000000337  |
| 29 | 6 | 0.000001153  | 0.000011217  | -0.000007702 |
| 30 | 1 | 0.000001952  | 0.000001659  | -0.000000680 |
| 31 | 1 | -0.000002157 | 0.000001332  | 0.0000006320 |

-----

|                                            |                             |
|--------------------------------------------|-----------------------------|
| Zero-point correction=                     | 0.226175 (Hartree/Particle) |
| Thermal correction to Energy=              | 0.244911                    |
| Thermal correction to Enthalpy=            | 0.245855                    |
| Thermal correction to Gibbs Free Energy=   | 0.173532                    |
| Sum of electronic and zero-point Energies= | -1219.089001                |

Sum of electronic and thermal Energies= -1219.070265

Sum of electronic and thermal Enthalpies= -1219.069321

Sum of electronic and thermal Free Energies= -1219.141644

**INC-1(2)**

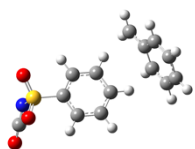

---

| Center<br>Number | Atomic<br>Number | Forces (Hartrees/Bohr) |              |              |
|------------------|------------------|------------------------|--------------|--------------|
|                  |                  | X                      | Y            | Z            |
| 1                | 6                | 0.000021816            | -0.000028811 | -0.000010462 |
| 2                | 6                | 0.000000412            | -0.000007238 | 0.000021190  |
| 3                | 6                | -0.000007936           | -0.000018993 | -0.000015867 |
| 4                | 6                | 0.000004957            | 0.000009773  | -0.000021436 |
| 5                | 6                | 0.000032577            | 0.000022097  | 0.000031546  |
| 6                | 6                | -0.000013388           | -0.000101600 | -0.000002844 |
| 7                | 1                | -0.000001826           | -0.000003540 | -0.000000069 |
| 8                | 1                | 0.000006620            | 0.000000366  | 0.000001560  |
| 9                | 1                | 0.000004473            | -0.000000680 | -0.000001333 |
| 10               | 1                | -0.000016635           | -0.000058188 | -0.000017458 |
| 11               | 1                | -0.000021856           | 0.000156306  | 0.000009347  |
| 12               | 16               | -0.000144046           | 0.000019180  | 0.000048512  |

|    |   |              |              |              |
|----|---|--------------|--------------|--------------|
| 13 | 8 | 0.000059188  | 0.000027371  | -0.000026677 |
| 14 | 8 | 0.000046411  | -0.000006590 | 0.000002323  |
| 15 | 7 | 0.000009138  | 0.000020676  | 0.000014243  |
| 16 | 6 | -0.000026457 | -0.000014392 | -0.000060358 |
| 17 | 8 | 0.000017584  | -0.000014005 | 0.000034720  |
| 18 | 6 | -0.000014804 | 0.000009070  | -0.000014244 |
| 19 | 6 | -0.000003500 | 0.000001704  | -0.000006702 |
| 20 | 6 | 0.000008354  | 0.000009049  | 0.000015734  |
| 21 | 6 | 0.000017787  | -0.000002310 | -0.000006454 |
| 22 | 1 | 0.000007325  | 0.000009537  | 0.000012003  |
| 23 | 6 | 0.000018098  | -0.000013588 | -0.000004688 |
| 24 | 1 | 0.000001192  | 0.000004218  | -0.000019442 |
| 25 | 6 | -0.000013157 | -0.000022729 | 0.000002751  |
| 26 | 1 | -0.000001176 | -0.000003800 | 0.000013744  |
| 27 | 1 | -0.000003054 | -0.000012794 | -0.000010342 |
| 28 | 1 | 0.000001856  | -0.000019254 | 0.000009302  |
| 29 | 6 | 0.000011012  | 0.000032781  | 0.000006623  |
| 30 | 1 | 0.000005532  | 0.000002227  | -0.000017544 |
| 31 | 1 | -0.000006498 | 0.000004157  | 0.000012324  |

-----  
Zero-point correction= 0.226315 (Hartree/Particle)

Thermal correction to Energy= 0.245029

Thermal correction to Enthalpy= 0.245973

Thermal correction to Gibbs Free Energy= 0.173867

Sum of electronic and zero-point Energies= -1219.088259

Sum of electronic and thermal Energies= -1219.069545

Sum of electronic and thermal Enthalpies= -1219.068601

Sum of electronic and thermal Free Energies= -1219.140707

### INC-1(3)

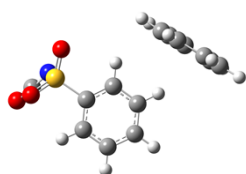

| Center<br>Number | Atomic<br>Number | Forces (Hartrees/Bohr) |              |              |
|------------------|------------------|------------------------|--------------|--------------|
|                  |                  | X                      | Y            | Z            |
| 1                | 6                | 0.000003868            | -0.000000289 | 0.000007207  |
| 2                | 6                | -0.000000553           | -0.000000126 | -0.000001644 |
| 3                | 6                | 0.000001007            | -0.000001037 | 0.000001501  |
| 4                | 6                | -0.000000850           | -0.000002149 | 0.000001098  |
| 5                | 6                | 0.000001078            | -0.000001786 | 0.000001029  |
| 6                | 1                | 0.000002465            | -0.000002314 | -0.000000345 |
| 7                | 1                | -0.000001122           | -0.000000383 | 0.000000809  |
| 8                | 1                | 0.000000568            | -0.000002743 | 0.000001216  |
| 9                | 1                | 0.000000373            | -0.000002844 | 0.000000626  |
| 10               | 16               | -0.000000260           | -0.000000221 | 0.000003617  |
| 11               | 8                | -0.000002602           | 0.000001845  | -0.000001179 |
| 12               | 8                | -0.000001070           | 0.000003790  | -0.000000152 |
| 13               | 7                | -0.000004510           | 0.000003248  | 0.000002258  |
| 14               | 6                | 0.000002119            | -0.000000296 | -0.000006440 |
| 15               | 8                | -0.000006692           | 0.000002860  | 0.000006326  |
| 16               | 6                | 0.000001323            | -0.000001220 | -0.000001222 |
| 17               | 1                | -0.000000795           | 0.000001979  | 0.000000247  |
| 18               | 6                | 0.000001069            | 0.000000930  | -0.000000880 |
| 19               | 1                | 0.000001195            | 0.000001677  | -0.000002649 |

|    |   |              |              |              |
|----|---|--------------|--------------|--------------|
| 20 | 1 | 0.000002517  | 0.000001187  | -0.000002277 |
| 21 | 6 | -0.000001624 | 0.000001414  | -0.000003748 |
| 22 | 6 | -0.000000575 | 0.000002006  | 0.000000926  |
| 23 | 6 | -0.000000971 | -0.000000796 | -0.000005215 |
| 24 | 6 | 0.000000557  | -0.000000306 | -0.000001003 |
| 25 | 1 | -0.000000495 | 0.000001497  | -0.000000971 |
| 26 | 6 | 0.000001008  | -0.000000025 | -0.000000709 |
| 27 | 1 | 0.000002531  | -0.000000872 | -0.000001379 |
| 28 | 6 | 0.000000034  | -0.000001600 | 0.000001453  |
| 29 | 1 | -0.000001276 | 0.000000333  | 0.000000816  |
| 30 | 1 | 0.000001790  | -0.000002179 | -0.000000014 |
| 31 | 1 | -0.000000103 | -0.000001579 | 0.000000696  |

-----

Zero-point correction= 0.226047 (Hartree/Particle)

Thermal correction to Energy= 0.244832

Thermal correction to Enthalpy= 0.245776

Thermal correction to Gibbs Free Energy= 0.172614

Sum of electronic and zero-point Energies= -1219.086045

Sum of electronic and thermal Energies= -1219.067260

Sum of electronic and thermal Enthalpies= -1219.066316

Sum of electronic and thermal Free Energies= -1219.139478

## INC-TS

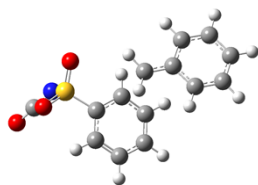

-----

| Center<br>Number | Atomic<br>Number | Forces (Hartrees/Bohr) |             |              |
|------------------|------------------|------------------------|-------------|--------------|
|                  |                  | X                      | Y           | Z            |
| 1                | 6                | 0.000005213            | 0.000015922 | -0.000004820 |

-----

|    |    |              |              |              |
|----|----|--------------|--------------|--------------|
| 2  | 6  | 0.000014781  | 0.000002203  | 0.000027443  |
| 3  | 6  | 0.000002019  | 0.000001956  | 0.000001294  |
| 4  | 6  | 0.000006909  | -0.000002210 | 0.000009854  |
| 5  | 6  | -0.000007633 | -0.000000013 | -0.000004097 |
| 6  | 1  | 0.000000632  | -0.000004490 | -0.000000336 |
| 7  | 1  | -0.000000558 | 0.000002859  | 0.000001365  |
| 8  | 1  | 0.000000598  | 0.000010179  | 0.000002358  |
| 9  | 1  | 0.000001952  | 0.000002369  | 0.000001131  |
| 10 | 16 | 0.000000478  | 0.000010868  | -0.000000245 |
| 11 | 8  | -0.000000354 | 0.000001716  | 0.000000726  |
| 12 | 8  | -0.000003751 | 0.000000198  | -0.000001086 |
| 13 | 7  | -0.000000458 | -0.000016371 | -0.000000550 |
| 14 | 6  | 0.000003045  | -0.000002210 | -0.000000422 |
| 15 | 8  | 0.000003201  | 0.000000692  | 0.000000176  |
| 16 | 6  | -0.000021806 | -0.000000548 | -0.000024491 |
| 17 | 1  | 0.000011957  | -0.000006795 | -0.000001983 |
| 18 | 6  | -0.000009577 | -0.000005864 | -0.000032320 |
| 19 | 1  | -0.000004504 | 0.000000856  | -0.000001442 |
| 20 | 1  | -0.000000573 | 0.000007077  | 0.000001423  |
| 21 | 6  | 0.000003317  | -0.000000665 | 0.000026594  |
| 22 | 6  | 0.000001404  | -0.000001830 | 0.000000592  |
| 23 | 6  | -0.000002504 | -0.000002489 | 0.000005967  |
| 24 | 6  | 0.000000045  | -0.000003770 | -0.000002369 |
| 25 | 1  | -0.000000463 | -0.000004064 | -0.000002370 |
| 26 | 6  | -0.000001818 | -0.000000807 | -0.000002222 |
| 27 | 1  | -0.000002296 | 0.000002076  | 0.000000922  |
| 28 | 6  | 0.000000702  | -0.000001745 | 0.000001896  |
| 29 | 1  | 0.000000223  | -0.000004542 | -0.000002190 |
| 30 | 1  | -0.000000862 | 0.000001186  | 0.000000597  |
| 31 | 1  | 0.000000681  | -0.000001743 | -0.000001397 |

---

|                                              |                             |
|----------------------------------------------|-----------------------------|
| Zero-point correction=                       | 0.226468 (Hartree/Particle) |
| Thermal correction to Energy=                | 0.244103                    |
| Thermal correction to Enthalpy=              | 0.245047                    |
| Thermal correction to Gibbs Free Energy=     | 0.176931                    |
| Sum of electronic and zero-point Energies=   | -1219.084169                |
| Sum of electronic and thermal Energies=      | -1219.066534                |
| Sum of electronic and thermal Enthalpies=    | -1219.065590                |
| Sum of electronic and thermal Free Energies= | -1219.133706                |

**E.o**

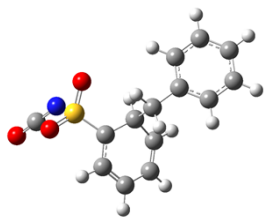

---

| Center | Atomic | Forces (Hartrees/Bohr) |              |              |
|--------|--------|------------------------|--------------|--------------|
| Number | Number | X                      | Y            | Z            |
| 1      | 6      | -0.000006887           | 0.000003120  | -0.000001165 |
| 2      | 6      | 0.000004947            | 0.000010952  | -0.000003538 |
| 3      | 6      | -0.000003449           | -0.000002722 | 0.000005458  |
| 4      | 6      | -0.000000125           | -0.000001380 | -0.000005260 |
| 5      | 6      | 0.000001673            | 0.000003070  | 0.000002235  |
| 6      | 1      | 0.000001440            | -0.000000182 | -0.000000120 |
| 7      | 1      | 0.000001071            | 0.000000638  | -0.000001777 |
| 8      | 1      | 0.000000490            | 0.000002325  | -0.000000610 |
| 9      | 1      | 0.000000419            | 0.000001658  | -0.000000273 |
| 10     | 16     | -0.000002236           | -0.000004208 | 0.000002634  |
| 11     | 8      | 0.000001377            | 0.000000087  | -0.000000898 |
| 12     | 8      | 0.000002188            | -0.000000026 | -0.000003351 |
| 13     | 7      | 0.000002066            | -0.000005691 | 0.000002768  |
| 14     | 6      | -0.000000772           | 0.000005513  | -0.000003599 |
| 15     | 8      | 0.000004531            | -0.000004320 | -0.000000355 |



|    |   |              |              |              |
|----|---|--------------|--------------|--------------|
| 16 | 6 | 0.000005833  | -0.000008639 | -0.000001126 |
| 17 | 1 | -0.000000452 | 0.000000934  | 0.000000107  |
| 18 | 6 | -0.000004454 | 0.000005810  | 0.000001060  |
| 19 | 1 | 0.000000201  | -0.000001138 | -0.000000535 |
| 20 | 1 | 0.000000183  | -0.000000793 | 0.000000014  |
| 21 | 6 | 0.000001525  | 0.000002594  | 0.000001929  |
| 22 | 6 | -0.000002182 | -0.000002917 | -0.000000921 |
| 23 | 6 | -0.000000995 | -0.000000264 | 0.000001524  |
| 24 | 6 | 0.000000794  | -0.000003108 | 0.000001661  |
| 25 | 1 | 0.000000228  | -0.000001372 | 0.000000521  |
| 26 | 6 | -0.000001978 | -0.000001630 | -0.000000782 |
| 27 | 1 | -0.000001447 | 0.000000470  | 0.000000450  |
| 28 | 6 | -0.000000537 | 0.000002875  | 0.000001015  |
| 29 | 1 | -0.000000668 | -0.000001246 | 0.000000729  |
| 30 | 1 | -0.000001612 | 0.000000381  | 0.000001044  |
| 31 | 1 | -0.000001173 | -0.000000790 | 0.000001159  |

-----

|                                            |                             |
|--------------------------------------------|-----------------------------|
| Zero-point correction=                     | 0.230712 (Hartree/Particle) |
| Thermal correction to Energy=              | 0.248079                    |
| Thermal correction to Enthalpy=            | 0.249023                    |
| Thermal correction to Gibbs Free Energy=   | 0.181896                    |
| Sum of electronic and zero-point Energies= | -1219.114712                |

Sum of electronic and thermal Energies= -1219.097345

Sum of electronic and thermal Enthalpies= -1219.096401

Sum of electronic and thermal Free Energies= -1219.163528

**B.o**

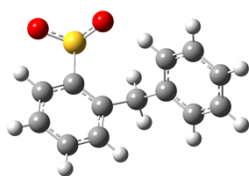

---

| Center | Atomic | Forces (Hartrees/Bohr) |              |              |
|--------|--------|------------------------|--------------|--------------|
| Number | Number | X                      | Y            | Z            |
| 1      | 6      | 0.000004139            | -0.000009443 | 0.000021513  |
| 2      | 6      | -0.000026726           | -0.000001767 | -0.000013883 |
| 3      | 6      | 0.000028310            | -0.000005005 | -0.000004538 |
| 4      | 1      | -0.000000811           | -0.000003349 | 0.000001345  |
| 5      | 1      | -0.000001390           | 0.000000035  | 0.000000292  |
| 6      | 16     | 0.000005191            | -0.000000684 | -0.000006598 |
| 7      | 8      | -0.000006299           | 0.000000245  | 0.000007633  |
| 8      | 8      | -0.000007874           | 0.000002102  | 0.000000635  |
| 9      | 6      | 0.000002065            | -0.000002065 | -0.000027397 |
| 10     | 6      | -0.000008054           | 0.000004765  | -0.000010846 |
| 11     | 6      | -0.000014474           | -0.000000218 | 0.000014747  |

|    |   |              |              |              |
|----|---|--------------|--------------|--------------|
| 12 | 1 | 0.000001841  | -0.000004308 | 0.000000757  |
| 13 | 1 | 0.000000331  | -0.000004933 | -0.000001107 |
| 14 | 6 | 0.000033354  | 0.000000062  | 0.000005454  |
| 15 | 1 | 0.000000836  | 0.000003522  | -0.000004266 |
| 16 | 1 | -0.000004223 | -0.000001285 | -0.000001221 |
| 17 | 6 | -0.000041951 | 0.000017236  | 0.000010683  |
| 18 | 6 | 0.000006680  | -0.000001867 | -0.000001213 |
| 19 | 6 | 0.000020528  | -0.000013350 | 0.000002192  |
| 20 | 6 | 0.000003141  | 0.000001513  | 0.000002238  |
| 21 | 1 | 0.000002294  | 0.000001139  | 0.000000148  |
| 22 | 6 | 0.000006818  | 0.000001183  | -0.000003145 |
| 23 | 1 | -0.000002851 | 0.000004918  | -0.000001796 |
| 24 | 6 | -0.000001902 | 0.000003607  | -0.000001467 |
| 25 | 1 | 0.000001929  | -0.000000877 | 0.000000002  |
| 26 | 1 | -0.000001382 | 0.000003342  | 0.000006106  |
| 27 | 1 | 0.000000481  | 0.000005482  | 0.000003732  |

-----

|                                            |                             |
|--------------------------------------------|-----------------------------|
| Zero-point correction=                     | 0.206252 (Hartree/Particle) |
| Thermal correction to Energy=              | 0.219834                    |
| Thermal correction to Enthalpy=            | 0.220778                    |
| Thermal correction to Gibbs Free Energy=   | 0.164474                    |
| Sum of electronic and zero-point Energies= | -1050.504338                |

Sum of electronic and thermal Energies= -1050.490757  
 Sum of electronic and thermal Enthalpies= -1050.489813  
 Sum of electronic and thermal Free Energies= -1050.546117

HNCO

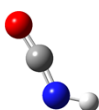


---

| Center<br>Number | Atomic<br>Number | Forces (Hartrees/Bohr) |              |              |
|------------------|------------------|------------------------|--------------|--------------|
|                  |                  | X                      | Y            | Z            |
| 1                | 6                | -0.000083817           | -0.000048392 | 0.000038363  |
| 2                | 7                | -0.000033823           | -0.000019528 | -0.000067027 |
| 3                | 8                | 0.000116356            | 0.000067178  | -0.000034388 |
| 4                | 1                | 0.000001285            | 0.000000742  | 0.000063052  |

---

Zero-point correction= 0.021189 (Hartree/Particle)  
 Thermal correction to Energy= 0.024458  
 Thermal correction to Enthalpy= 0.025402  
 Thermal correction to Gibbs Free Energy= -0.001715  
 Sum of electronic and zero-point Energies= -168.670134  
 Sum of electronic and thermal Energies= -168.666865

Sum of electronic and thermal Enthalpies= -168.665920

Sum of electronic and thermal Free Energies= -168.693038

**D**

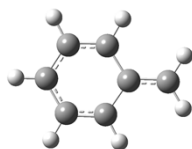

---

| Center | Atomic | Forces (Hartrees/Bohr) |              |              |
|--------|--------|------------------------|--------------|--------------|
| Number | Number | X                      | Y            | Z            |
| 1      | 6      | 0.000066337            | -0.000028546 | 0.000041079  |
| 2      | 6      | -0.000008418           | 0.000007850  | -0.000001895 |
| 3      | 6      | -0.000011027           | 0.000006172  | -0.000006728 |
| 4      | 6      | -0.000012982           | 0.000007206  | 0.000002325  |
| 5      | 1      | -0.000010065           | -0.000002876 | -0.000011598 |
| 6      | 6      | 0.000002375            | 0.000004406  | -0.000013060 |
| 7      | 1      | -0.000014678           | -0.000001513 | -0.000005453 |
| 8      | 6      | -0.000006666           | -0.000001418 | -0.000002218 |
| 9      | 1      | 0.000017958            | -0.000001591 | 0.000012086  |
| 10     | 1      | 0.000018704            | -0.000000761 | 0.000012452  |
| 11     | 1      | 0.000021950            | -0.000001690 | 0.000012972  |
| 12     | 6      | -0.000057279           | 0.000010288  | -0.000036898 |

|    |   |              |             |              |
|----|---|--------------|-------------|--------------|
| 13 | 1 | 0.000001895  | 0.000001553 | -0.000009523 |
| 14 | 1 | -0.000008104 | 0.000000919 | 0.000006460  |

-----

|                                              |                             |
|----------------------------------------------|-----------------------------|
| Zero-point correction=                       | 0.111927 (Hartree/Particle) |
| Thermal correction to Energy=                | 0.117921                    |
| Thermal correction to Enthalpy=              | 0.118866                    |
| Thermal correction to Gibbs Free Energy=     | 0.082666                    |
| Sum of electronic and zero-point Energies=   | -270.855024                 |
| Sum of electronic and thermal Energies=      | -270.849030                 |
| Sum of electronic and thermal Enthalpies=    | -270.848086                 |
| Sum of electronic and thermal Free Energies= | -270.884285                 |

toluene

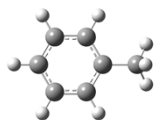

-----

| Center<br>Number | Atomic<br>Number | Forces (Hartrees/Bohr) |              |              |
|------------------|------------------|------------------------|--------------|--------------|
|                  |                  | X                      | Y            | Z            |
| 1                | 6                | 0.000029972            | 0.000010508  | 0.000047534  |
| 2                | 6                | -0.000004744           | 0.000009559  | -0.000039561 |
| 3                | 6                | 0.000011286            | -0.000028645 | 0.000012787  |

-----

|    |   |              |              |              |
|----|---|--------------|--------------|--------------|
| 4  | 6 | -0.000004112 | 0.000011692  | -0.000025623 |
| 5  | 6 | -0.000040952 | 0.000009424  | 0.000030823  |
| 6  | 6 | 0.000010555  | -0.000012935 | 0.000031210  |
| 7  | 1 | -0.000029125 | 0.000002850  | 0.000005873  |
| 8  | 1 | -0.000024791 | -0.000003558 | 0.000009601  |
| 9  | 1 | 0.000025277  | -0.000003899 | 0.000007523  |
| 10 | 1 | 0.000030678  | 0.000002747  | 0.000007708  |
| 11 | 1 | -0.000000917 | 0.000002262  | -0.000006055 |
| 12 | 6 | -0.000002620 | 0.000020370  | 0.000023472  |
| 13 | 1 | -0.000001421 | 0.000067068  | -0.000022447 |
| 14 | 1 | -0.000063512 | -0.000045143 | -0.000041232 |
| 15 | 1 | 0.000064425  | -0.000042298 | -0.000041614 |

-----

Zero-point correction= 0.127729 (Hartree/Particle)

Thermal correction to Energy= 0.133947

Thermal correction to Enthalpy= 0.134891

Thermal correction to Gibbs Free Energy= 0.097143

Sum of electronic and zero-point Energies= -271.461622

Sum of electronic and thermal Energies= -271.455405

Sum of electronic and thermal Enthalpies= -271.454461

Sum of electronic and thermal Free Energies= -271.492208

Benzenesulfonylisocyanate

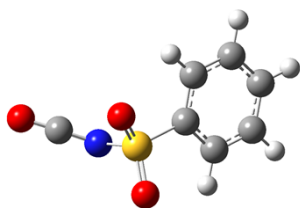


---

| Center<br>Number | Atomic<br>Number | Forces (Hartrees/Bohr) |              |              |
|------------------|------------------|------------------------|--------------|--------------|
|                  |                  | X                      | Y            | Z            |
| 1                | 6                | -0.000010764           | 0.000004424  | 0.000017030  |
| 2                | 6                | -0.000005668           | -0.000008183 | -0.000005465 |
| 3                | 6                | -0.000000584           | -0.000002159 | 0.000001527  |
| 4                | 6                | -0.000006489           | 0.000001063  | 0.000005609  |
| 5                | 6                | -0.000011220           | -0.000000936 | -0.000017952 |
| 6                | 6                | 0.000011060            | 0.000000251  | 0.000000204  |
| 7                | 1                | -0.000004005           | 0.000002642  | 0.000002988  |
| 8                | 1                | 0.000002430            | 0.000006571  | 0.000003346  |
| 9                | 1                | 0.000001324            | -0.000006860 | -0.000004265 |
| 10               | 1                | -0.000003635           | -0.000001781 | -0.000002561 |
| 11               | 1                | -0.000010141           | 0.000000212  | -0.000000191 |
| 12               | 16               | 0.000002395            | -0.000009619 | -0.000030608 |
| 13               | 8                | 0.000003639            | -0.000003848 | -0.000016998 |
| 14               | 8                | 0.000003569            | 0.000005941  | 0.000020811  |



|    |   |              |              |              |
|----|---|--------------|--------------|--------------|
| 15 | 7 | -0.000096237 | -0.000020280 | -0.000084771 |
| 16 | 6 | 0.000290040  | 0.000070662  | 0.000283826  |
| 17 | 8 | -0.000165712 | -0.000038100 | -0.000172532 |

---

|                                              |                             |
|----------------------------------------------|-----------------------------|
| Zero-point correction=                       | 0.113780 (Hartree/Particle) |
| Thermal correction to Energy=                | 0.124316                    |
| Thermal correction to Enthalpy=              | 0.125260                    |
| Thermal correction to Gibbs Free Energy=     | 0.074068                    |
| Sum of electronic and zero-point Energies=   | -948.208470                 |
| Sum of electronic and thermal Energies=      | -948.197933                 |
| Sum of electronic and thermal Enthalpies=    | -948.196989                 |
| Sum of electronic and thermal Free Energies= | -948.248182                 |

**TS.o**

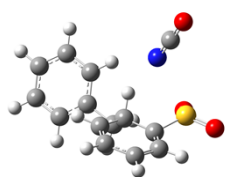


---

| Center<br>Number | Atomic<br>Number | Forces (Hartrees/Bohr) |              |             |
|------------------|------------------|------------------------|--------------|-------------|
|                  |                  | X                      | Y            | Z           |
| 1                | 6                | 0.000000456            | 0.000000804  | 0.000000867 |
| 2                | 6                | -0.000001078           | -0.000002561 | 0.000005440 |
| 3                | 6                | -0.000001737           | -0.000002470 | 0.000002513 |
| 4                | 6                | 0.000000706            | -0.000000680 | 0.000003582 |
| 5                | 6                | 0.000000257            | 0.000000440  | 0.000002618 |
| 6                | 1                | 0.000001489            | 0.000001537  | 0.000001075 |
| 7                | 1                | -0.000001982           | -0.000003041 | 0.000002600 |

|    |    |              |             |             |
|----|----|--------------|-------------|-------------|
| 8  | 1  | -0.00000583  | -0.00001009 | 0.00004016  |
| 9  | 1  | 0.00001404   | 0.00001284  | 0.00002935  |
| 10 | 16 | -0.000018192 | 0.00003601  | -0.00006176 |
| 11 | 8  | -0.00002260  | -0.00004562 | 0.00003400  |
| 12 | 8  | 0.000011856  | -0.00009301 | 0.00000308  |
| 13 | 7  | -0.00001279  | -0.00000711 | -0.00001942 |
| 14 | 6  | -0.00001170  | -0.00004466 | -0.00002708 |
| 15 | 8  | -0.00002812  | -0.00000108 | -0.00005177 |
| 16 | 6  | -0.00000649  | -0.00001195 | -0.00000274 |
| 17 | 1  | -0.00001453  | 0.00001676  | 0.00000636  |
| 18 | 6  | 0.00000274   | -0.00000715 | 0.00001154  |
| 19 | 1  | -0.00000761  | -0.00000978 | -0.00000356 |
| 20 | 1  | 0.00000510   | -0.00000154 | 0.00001822  |
| 21 | 6  | 0.00001165   | 0.00001323  | -0.00000491 |
| 22 | 6  | 0.00000135   | 0.00000445  | -0.00001646 |
| 23 | 6  | 0.00001814   | 0.00001667  | 0.00000573  |
| 24 | 6  | 0.00000363   | 0.00001533  | -0.00003618 |
| 25 | 1  | 0.00000675   | -0.00000100 | -0.00002748 |
| 26 | 6  | 0.00002311   | 0.00003376  | -0.00000717 |
| 27 | 1  | 0.00001660   | 0.00001668  | 0.00001772  |
| 28 | 6  | 0.00002164   | 0.00002430  | -0.00001842 |
| 29 | 1  | 0.00001308   | 0.00002556  | -0.00004228 |
| 30 | 1  | 0.00002922   | 0.00003907  | -0.00000154 |
| 31 | 1  | 0.00002485   | 0.00003803  | -0.00003232 |

---

|                                              |                             |
|----------------------------------------------|-----------------------------|
| Zero-point correction=                       | 0.229008 (Hartree/Particle) |
| Thermal correction to Energy=                | 0.246297                    |
| Thermal correction to Enthalpy=              | 0.247242                    |
| Thermal correction to Gibbs Free Energy=     | 0.180661                    |
| Sum of electronic and zero-point Energies=   | -1219.101362                |
| Sum of electronic and thermal Energies=      | -1219.084072                |
| Sum of electronic and thermal Enthalpies=    | -1219.083128                |
| Sum of electronic and thermal Free Energies= | -1219.149709                |

### PT-TS.o

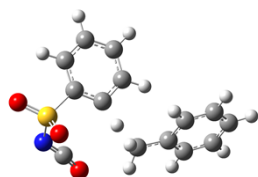


---

| Center | Atomic | Forces (Hartrees/Bohr) |              |              |
|--------|--------|------------------------|--------------|--------------|
| Number | Number | X                      | Y            | Z            |
| 1      | 6      | -0.000000694           | -0.000000326 | 0.000000327  |
| 2      | 6      | 0.000000051            | -0.000000339 | -0.000002058 |
| 3      | 6      | 0.000005589            | 0.000002203  | -0.000004446 |
| 4      | 6      | -0.000005417           | -0.000004253 | 0.000004754  |
| 5      | 6      | 0.000000102            | 0.000000150  | 0.000001997  |
| 6      | 6      | -0.000000020           | -0.000000604 | -0.000000350 |
| 7      | 1      | 0.000000178            | -0.000000508 | 0.000001360  |
| 8      | 1      | 0.000000829            | 0.000002155  | 0.000000315  |
| 9      | 1      | -0.000000628           | 0.000005789  | -0.000000185 |
| 10     | 1      | 0.000000275            | -0.000000816 | 0.000000128  |
| 11     | 1      | -0.000000577           | -0.000001272 | 0.000000990  |
| 12     | 16     | 0.000002684            | -0.000007708 | 0.000004519  |
| 13     | 8      | 0.000000227            | 0.000002492  | -0.000002597 |
| 14     | 8      | 0.000002698            | -0.000000705 | 0.000007492  |
| 15     | 7      | -0.000005971           | 0.000009697  | -0.000000639 |
| 16     | 6      | -0.000001699           | 0.000001918  | 0.000000738  |
| 17     | 8      | 0.000003334            | -0.000000767 | 0.000000793  |
| 18     | 6      | 0.000000103            | -0.000001870 | -0.000000686 |
| 19     | 6      | 0.000000805            | -0.000000167 | -0.000000152 |

|    |   |              |              |              |
|----|---|--------------|--------------|--------------|
| 20 | 6 | -0.000001706 | -0.000002175 | -0.000000688 |
| 21 | 6 | -0.000000220 | -0.000001538 | -0.000000759 |
| 22 | 1 | -0.000000001 | 0.000000233  | -0.000000072 |
| 23 | 6 | 0.000000285  | -0.000001090 | -0.000002204 |
| 24 | 1 | 0.000000706  | 0.000001131  | -0.000000343 |
| 25 | 6 | -0.000001049 | -0.000000171 | -0.000000838 |
| 26 | 1 | -0.000000411 | -0.000001174 | -0.000000460 |
| 27 | 1 | -0.000000428 | -0.000001116 | -0.000001752 |
| 28 | 1 | -0.000000364 | -0.000001471 | -0.000001688 |
| 29 | 6 | 0.000000325  | 0.000000554  | -0.000002458 |
| 30 | 1 | 0.000000898  | 0.000000943  | -0.000000295 |
| 31 | 1 | 0.000000094  | 0.000000804  | -0.000000745 |

-----

|                                              |                             |
|----------------------------------------------|-----------------------------|
| Zero-point correction=                       | 0.222112 (Hartree/Particle) |
| Thermal correction to Energy=                | 0.239963                    |
| Thermal correction to Enthalpy=              | 0.240907                    |
| Thermal correction to Gibbs Free Energy=     | 0.171937                    |
| Sum of electronic and zero-point Energies=   | -1219.074116                |
| Sum of electronic and thermal Energies=      | -1219.056265                |
| Sum of electronic and thermal Enthalpies=    | -1219.055321                |
| Sum of electronic and thermal Free Energies= | -1219.124290                |

**PT-TS.m**

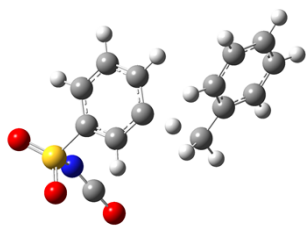

| Center<br>Number | Atomic<br>Number | Forces (Hartrees/Bohr) |             |             |
|------------------|------------------|------------------------|-------------|-------------|
|                  |                  | X                      | Y           | Z           |
| 1                | 6                | -0.00000201            | 0.00000909  | 0.00000718  |
| 2                | 6                | 0.00000138             | -0.00001397 | 0.00000309  |
| 3                | 6                | 0.00000522             | -0.00002030 | 0.00000554  |
| 4                | 6                | 0.00000693             | 0.00001299  | 0.00000521  |
| 5                | 6                | 0.00000045             | 0.00001017  | -0.00000067 |
| 6                | 1                | 0.00000433             | 0.00002939  | 0.00000954  |
| 7                | 1                | 0.00000472             | -0.00000269 | 0.00000686  |
| 8                | 1                | -0.00000037            | 0.00002303  | 0.00000676  |
| 9                | 16               | 0.00003041             | -0.00008510 | 0.00002800  |
| 10               | 8                | -0.00001405            | -0.00007922 | -0.00000263 |
| 11               | 8                | 0.00001207             | -0.00004552 | 0.00001466  |
| 12               | 7                | 0.00001329             | -0.00000216 | -0.00004633 |
| 13               | 6                | -0.00001771            | -0.00007009 | -0.00002496 |
| 14               | 8                | -0.00002185            | -0.00006429 | -0.00004119 |
| 15               | 6                | -0.00000395            | 0.00002100  | 0.00000102  |
| 16               | 6                | -0.00000459            | 0.00001861  | -0.00000841 |
| 17               | 6                | 0.00000645             | 0.00002110  | 0.00001343  |
| 18               | 6                | -0.00001626            | 0.00005059  | -0.00002294 |
| 19               | 1                | -0.00001933            | 0.00001957  | -0.00002899 |
| 20               | 6                | 0.00000565             | 0.00004781  | 0.00002332  |
| 21               | 1                | 0.00001637             | 0.00001760  | 0.00002966  |
| 22               | 6                | -0.00000262            | 0.00005288  | 0.00000810  |
| 23               | 1                | -0.00002164            | 0.00005183  | -0.00002613 |
| 24               | 1                | 0.00001334             | 0.00005497  | 0.00003048  |
| 25               | 1                | -0.00000700            | 0.00007238  | 0.00000090  |
| 26               | 6                | 0.00000563             | -0.00001063 | 0.00000064  |
| 27               | 1                | -0.00000324            | -0.00001408 | 0.00000346  |
| 28               | 1                | -0.00000537            | -0.00001526 | -0.00001050 |
| 29               | 1                | 0.00000741             | -0.00001617 | 0.00000899  |
| 30               | 6                | -0.00000249            | -0.00004249 | 0.00000277  |
| 31               | 1                | 0.00000886             | -0.00003104 | 0.00000314  |

Zero-point correction= 0.221547 (Hartree/Particle)

Thermal correction to Energy= 0.239703

Thermal correction to Enthalpy= 0.240648  
 Thermal correction to Gibbs Free Energy= 0.169127  
 Sum of electronic and zero-point Energies= -1219.070445  
 Sum of electronic and thermal Energies= -1219.052289  
 Sum of electronic and thermal Enthalpies= -1219.051345  
 Sum of electronic and thermal Free Energies= -1219.122866

**PT-TS.p**

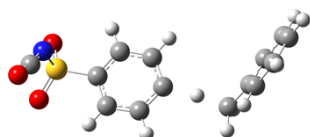

| Center<br>Number | Atomic<br>Number | Forces (Hartrees/Bohr) |             |             |
|------------------|------------------|------------------------|-------------|-------------|
|                  |                  | X                      | Y           | Z           |
| 1                | 6                | -0.00000201            | 0.00000909  | 0.00000718  |
| 2                | 6                | 0.00000138             | -0.00001397 | 0.00000309  |
| 3                | 6                | 0.00000522             | -0.00002030 | 0.00000554  |
| 4                | 6                | 0.00000693             | 0.00001299  | 0.00000521  |
| 5                | 6                | 0.00000045             | 0.00001017  | -0.00000067 |
| 6                | 1                | 0.00000433             | 0.00002939  | 0.00000954  |
| 7                | 1                | 0.00000472             | -0.00000269 | 0.00000686  |
| 8                | 1                | -0.00000037            | 0.00002303  | 0.00000676  |
| 9                | 16               | 0.00003041             | -0.00008510 | 0.00002800  |
| 10               | 8                | -0.00001405            | -0.00007922 | -0.00000263 |
| 11               | 8                | 0.00001207             | -0.00004552 | 0.00001466  |
| 12               | 7                | 0.00001329             | -0.00000216 | -0.00004633 |
| 13               | 6                | -0.00001771            | -0.00007009 | -0.00002496 |
| 14               | 8                | -0.00002185            | -0.00006429 | -0.00004119 |
| 15               | 6                | -0.00000395            | 0.00002100  | 0.00000102  |
| 16               | 6                | -0.00000459            | 0.00001861  | -0.00000841 |
| 17               | 6                | 0.00000645             | 0.00002110  | 0.00001343  |
| 18               | 6                | -0.00001626            | 0.00005059  | -0.00002294 |
| 19               | 1                | -0.00001933            | 0.00001957  | -0.00002899 |
| 20               | 6                | 0.00000565             | 0.00004781  | 0.00002332  |
| 21               | 1                | 0.00001637             | 0.00001760  | 0.00002966  |
| 22               | 6                | -0.00000262            | 0.00005288  | 0.00000810  |
| 23               | 1                | -0.00002164            | 0.00005183  | -0.00002613 |
| 24               | 1                | 0.00001334             | 0.00005497  | 0.00003048  |
| 25               | 1                | -0.00000700            | 0.00007238  | 0.00000090  |
| 26               | 6                | 0.00000563             | -0.00001063 | 0.00000064  |

|    |   |              |              |              |
|----|---|--------------|--------------|--------------|
| 27 | 1 | -0.000000324 | -0.000001408 | 0.000000346  |
| 28 | 1 | -0.000000537 | -0.000001526 | -0.000001050 |
| 29 | 1 | 0.000000741  | -0.000001617 | 0.000000899  |
| 30 | 6 | -0.000000249 | -0.000004249 | 0.000000277  |
| 31 | 1 | 0.000000886  | -0.000003104 | 0.000000314  |

---

|                                              |                             |
|----------------------------------------------|-----------------------------|
| Zero-point correction=                       | 0.221547 (Hartree/Particle) |
| Thermal correction to Energy=                | 0.239703                    |
| Thermal correction to Enthalpy=              | 0.240648                    |
| Thermal correction to Gibbs Free Energy=     | 0.169127                    |
| Sum of electronic and zero-point Energies=   | -1219.070445                |
| Sum of electronic and thermal Energies=      | -1219.052289                |
| Sum of electronic and thermal Enthalpies=    | -1219.051345                |
| Sum of electronic and thermal Free Energies= | -1219.122866                |

*C.m*

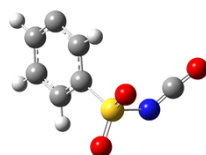


---

| Center<br>Number | Atomic<br>Number | Forces (Hartrees/Bohr) |              |              |
|------------------|------------------|------------------------|--------------|--------------|
|                  |                  | X                      | Y            | Z            |
| 1                | 6                | 0.000002485            | -0.000016162 | 0.000006823  |
| 2                | 6                | -0.000010124           | 0.000038200  | -0.000005553 |
| 3                | 6                | -0.000012700           | -0.000030691 | 0.000031972  |
| 4                | 6                | 0.000000597            | -0.000005308 | 0.000010071  |
| 5                | 6                | 0.000009257            | -0.000004042 | 0.000007185  |
| 6                | 6                | 0.000007196            | -0.000015013 | -0.000004895 |
| 7                | 1                | 0.000005102            | 0.000004993  | -0.000005055 |
| 8                | 1                | 0.000000545            | -0.000006838 | -0.000008605 |
| 9                | 1                | 0.000000609            | -0.000005290 | -0.000002707 |
| 10               | 16               | -0.000022417           | -0.000086795 | -0.000049438 |
| 11               | 8                | 0.000064647            | 0.000014961  | -0.000006684 |
| 12               | 8                | -0.000033775           | 0.000027294  | 0.000010635  |
| 13               | 7                | -0.000055260           | 0.000058438  | 0.000002701  |
| 14               | 6                | 0.000071370            | 0.000004040  | -0.000018896 |
| 15               | 8                | -0.000020160           | 0.000001676  | 0.000017554  |

16            1            -0.000007372    0.000020537    0.000014892

---

Zero-point correction=                    0.098339 (Hartree/Particle)  
Thermal correction to Energy=            0.109140  
Thermal correction to Enthalpy=         0.110084  
Thermal correction to Gibbs Free Energy= 0.059489  
Sum of electronic and zero-point Energies=         -947.609878  
Sum of electronic and thermal Energies=         -947.599077  
Sum of electronic and thermal Enthalpies=         -947.598133  
Sum of electronic and thermal Free Energies=         -947.648728

*C.p*

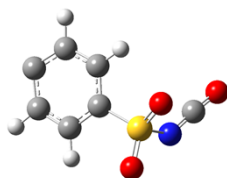

---

| Center<br>Number | Atomic<br>Number | Forces (Hartrees/Bohr) |              |              |
|------------------|------------------|------------------------|--------------|--------------|
|                  |                  | X                      | Y            | Z            |
| 1                | 6                | 0.000001693            | -0.000001075 | -0.000002843 |
| 2                | 6                | 0.000003257            | 0.000002561  | 0.000001349  |
| 3                | 6                | 0.000000437            | 0.000006654  | -0.000002282 |
| 4                | 6                | 0.000002853            | -0.000011599 | -0.000000034 |
| 5                | 6                | 0.000002244            | -0.000004467 | 0.000001800  |
| 6                | 6                | -0.000000320           | -0.000005544 | -0.000000200 |
| 7                | 1                | 0.000001983            | 0.000003646  | -0.000001144 |
| 8                | 1                | 0.000001221            | 0.000005950  | -0.000001637 |
| 9                | 16               | -0.000008111           | 0.000003653  | -0.000011165 |
| 10               | 8                | 0.000006139            | 0.000004572  | 0.000009196  |
| 11               | 8                | 0.000004327            | 0.000004077  | -0.000008486 |
| 12               | 7                | 0.000002055            | 0.000015079  | 0.000064807  |
| 13               | 6                | -0.000012803           | -0.000022160 | -0.000096812 |
| 14               | 8                | -0.000006484           | 0.000012556  | 0.000047512  |
| 15               | 1                | 0.000000730            | -0.000004081 | 0.000000336  |
| 16               | 1                | 0.000000781            | -0.000009824 | -0.000000398 |

---

Zero-point correction=                    0.098787 (Hartree/Particle)  
Thermal correction to Energy=            0.109407  
Thermal correction to Enthalpy=         0.110351  
Thermal correction to Gibbs Free Energy= 0.060442



|                                              |             |
|----------------------------------------------|-------------|
| Sum of electronic and zero-point Energies=   | -947.609063 |
| Sum of electronic and thermal Energies=      | -947.598443 |
| Sum of electronic and thermal Enthalpies=    | -947.597499 |
| Sum of electronic and thermal Free Energies= | -947.647408 |

**Figure S3.** DFT potential energy surfaces for PT of different sites (**compound 1** as the model).

All structures were optimized at the B3LYP/6-31++G(d,p) level of theory in kcal mol<sup>-1</sup> (in parentheses). The inset shows the optimized structure of **C.o**. The most energy-favorable channels are indicated by solid line, while others by dashed line

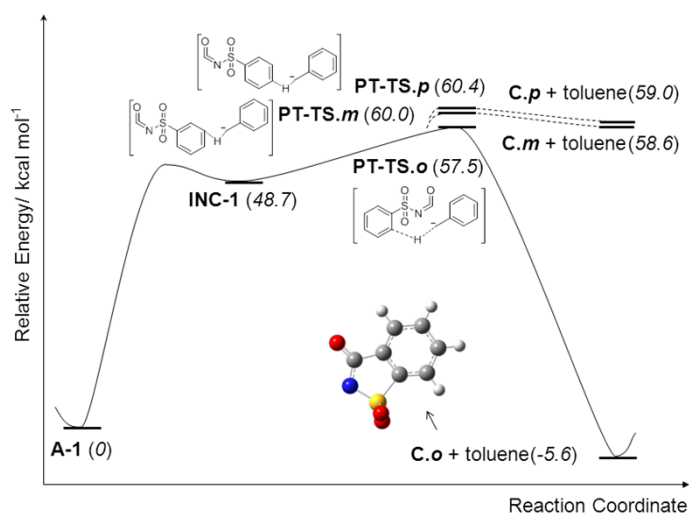

**Figure S4** Calculated potential energy diagram for the conversion of **INC-1** to **E.o** at the B3LYP/6-31++G(d,p) level. The relative energy of **[1 - H]<sup>-</sup>** is zero

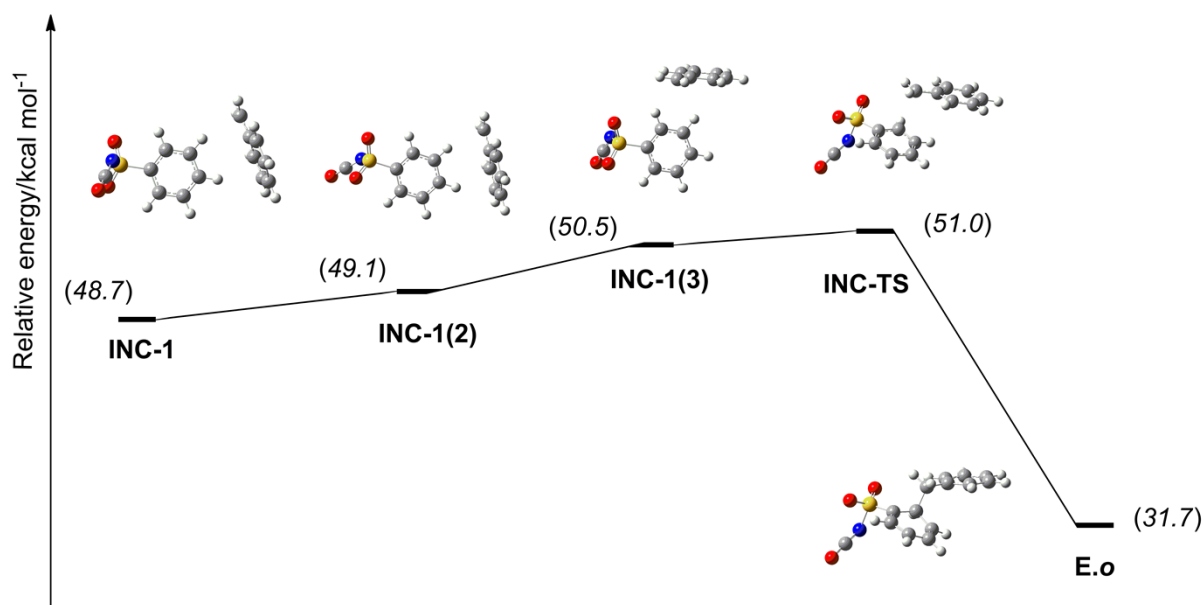

Statement: Within the ion/neutral complex, the ionic and neutral species can rotate with respect to each other. For the occurrence of the S<sub>N</sub>Ar reaction, benzyl anion must migrate to approach the *ortho* carbon. No significant energy barrier exists in the rotation process and the subsequent nucleophilic addition. Therefore formation of the σ-complex from the ion/neutral complex is favorable in terms of energy.

**Figure S5.**  $^1\text{H}$  NMR,  $^{13}\text{C}$  NMR spectra of *N*-(phenylsulfonyl)-benzeneacetamide (solvent:  $d_6$ -DMSO),  $^1\text{H}$  NMR spectra of other compounds

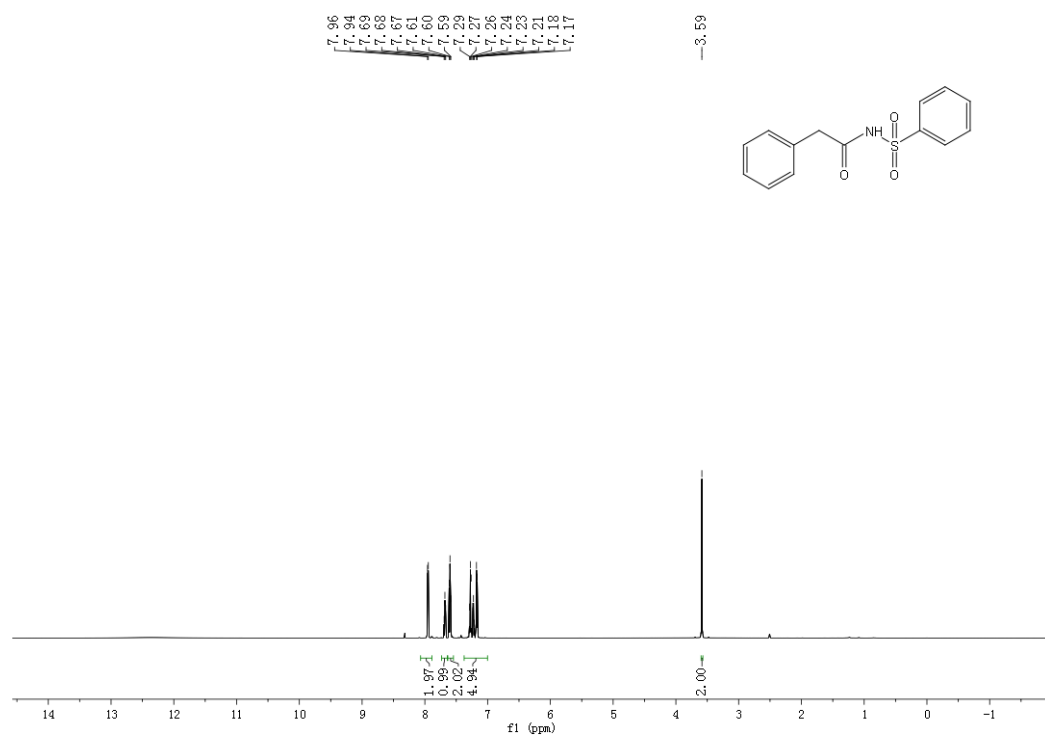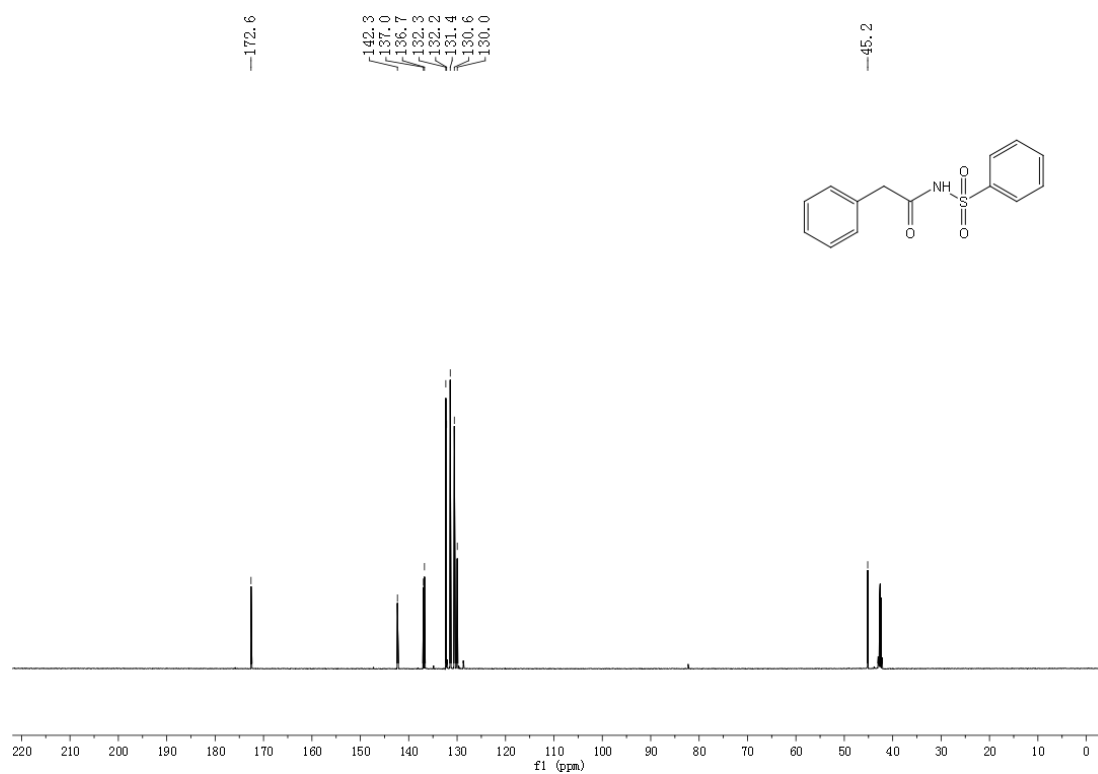



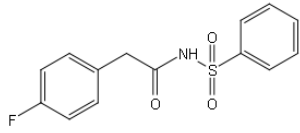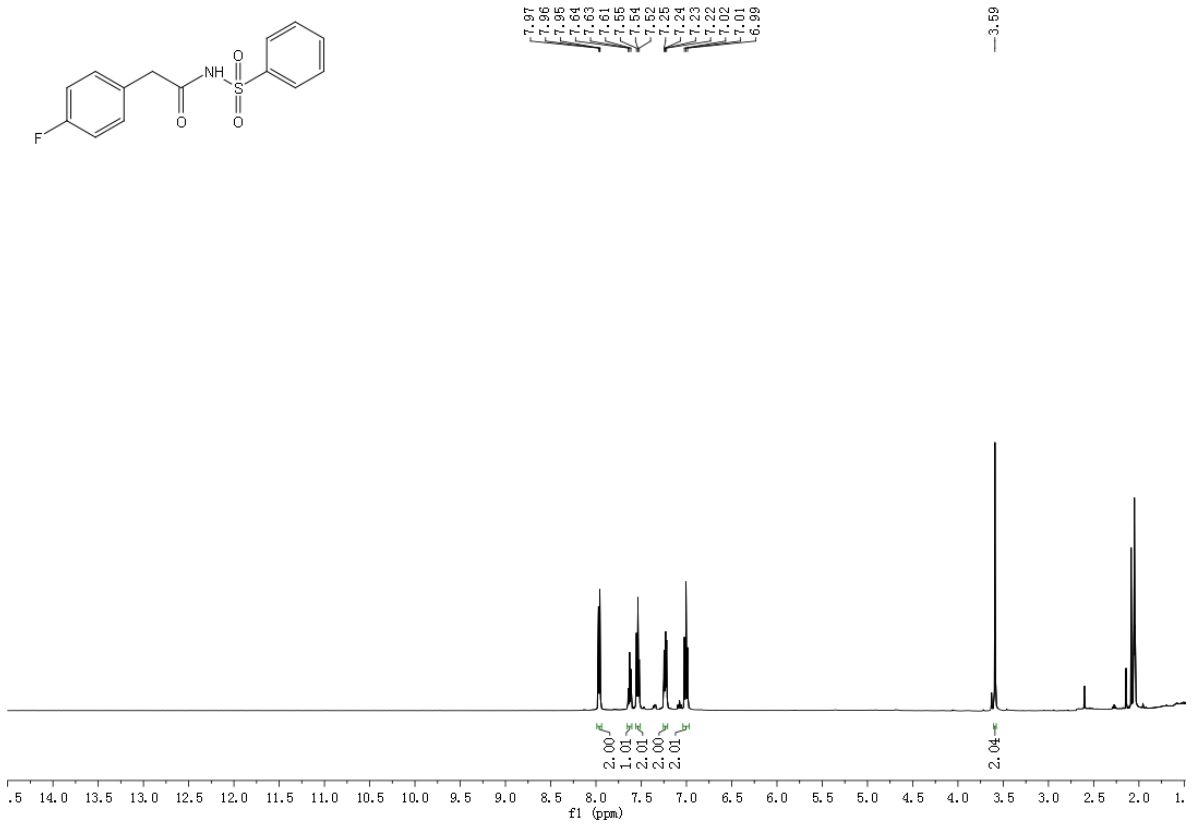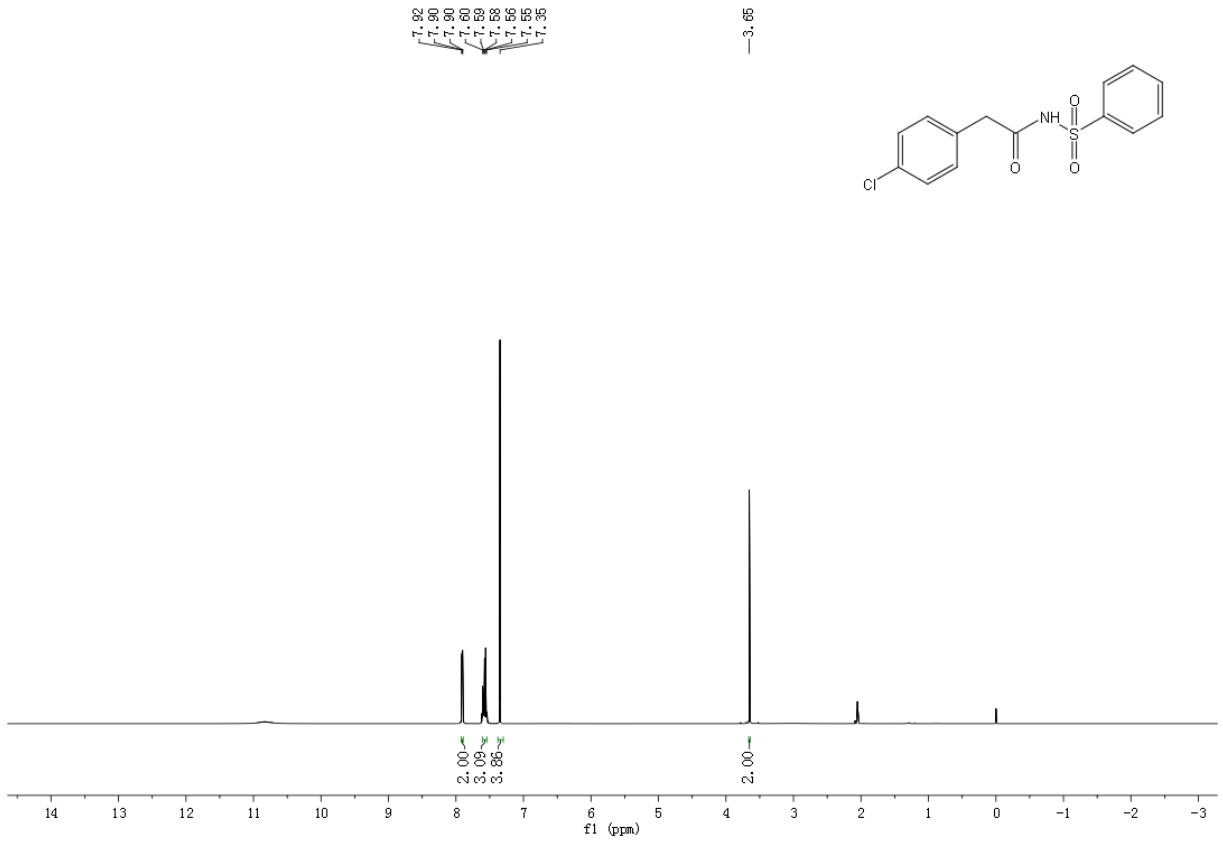

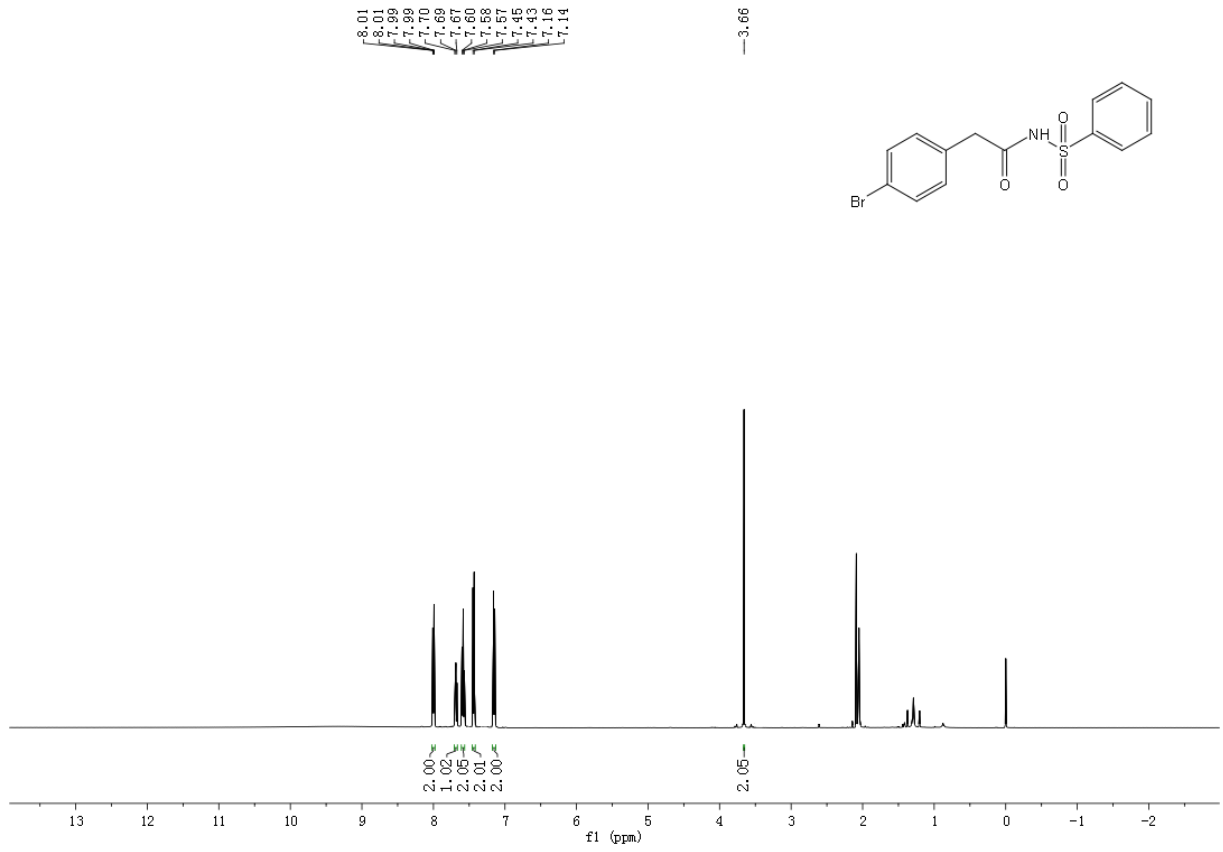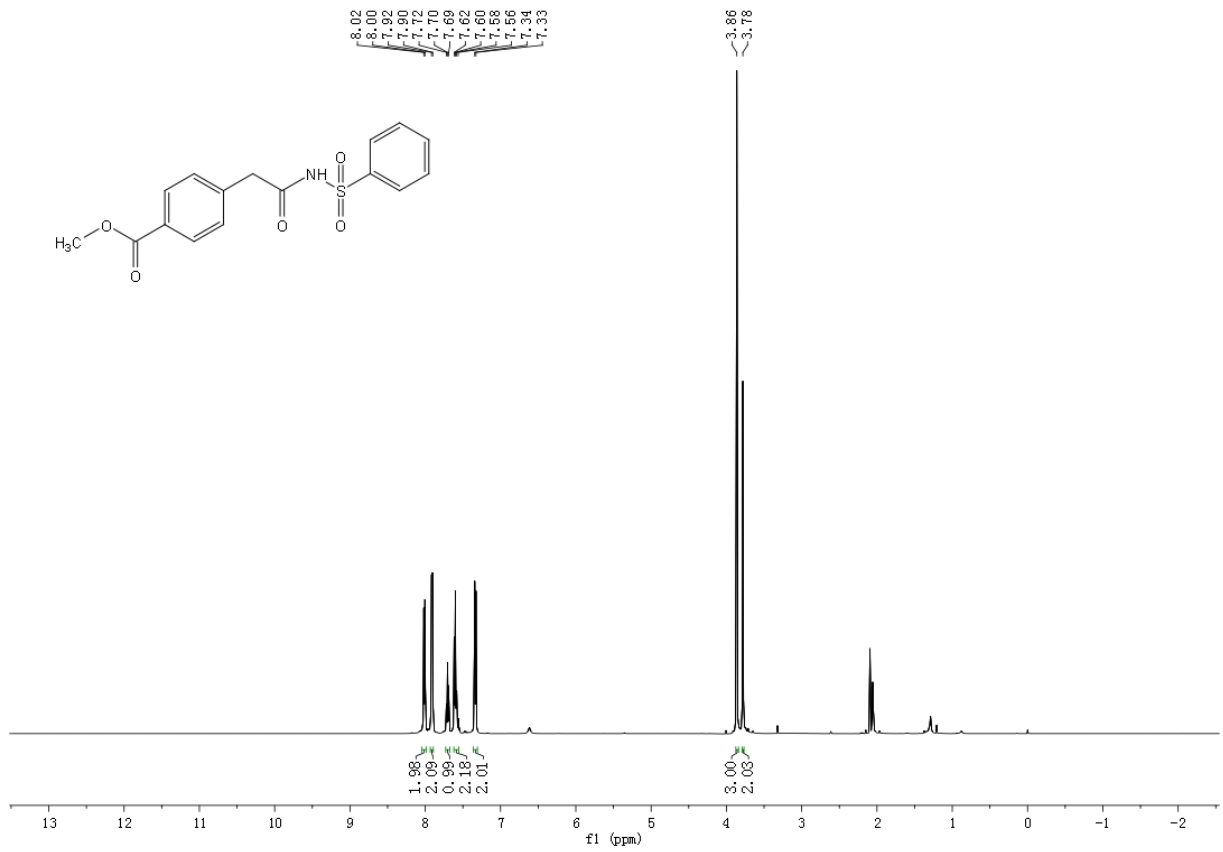

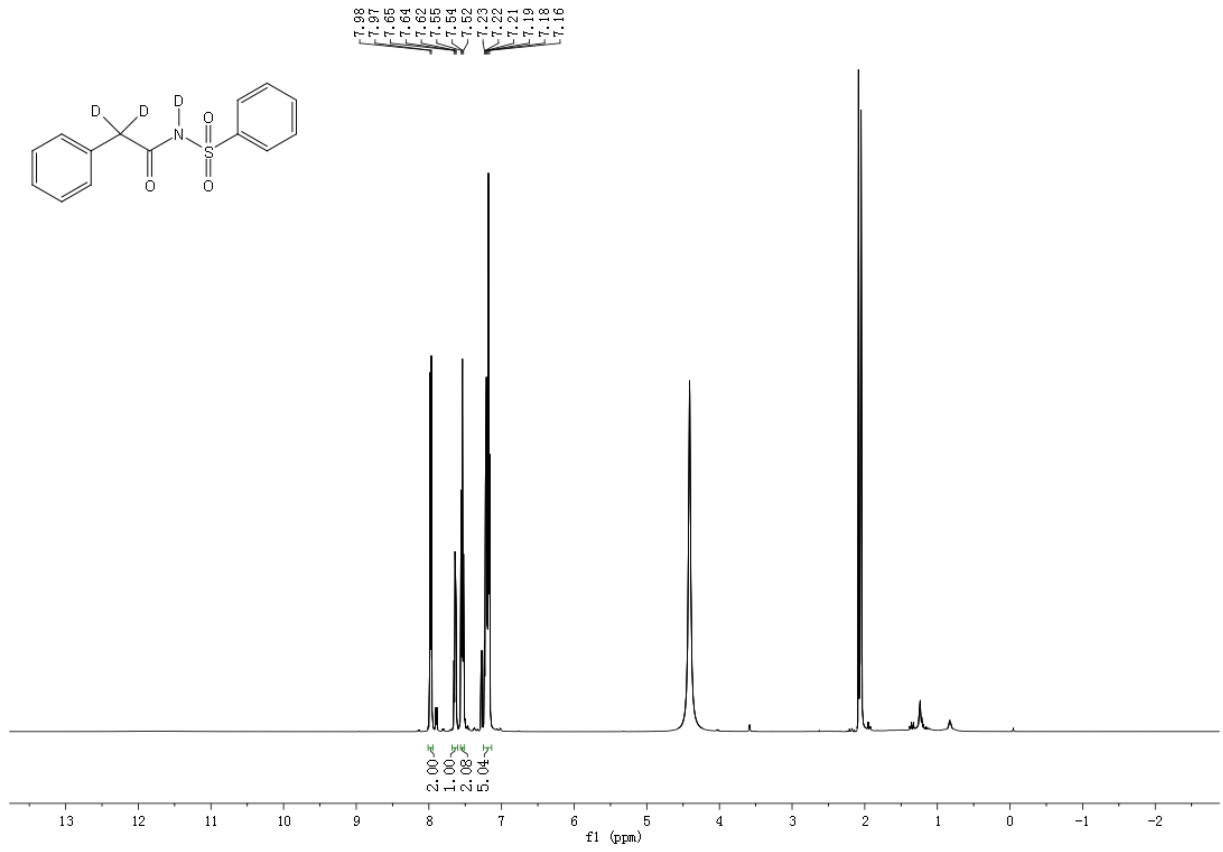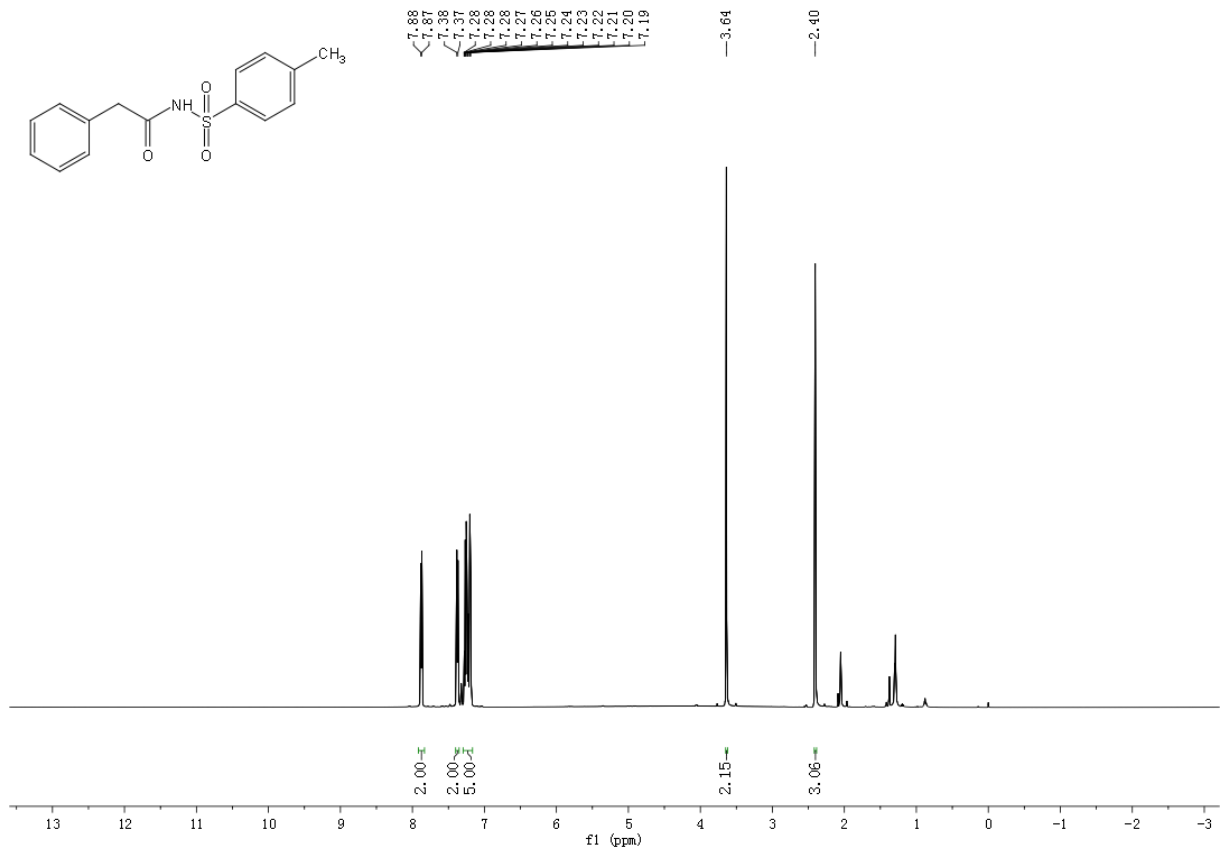



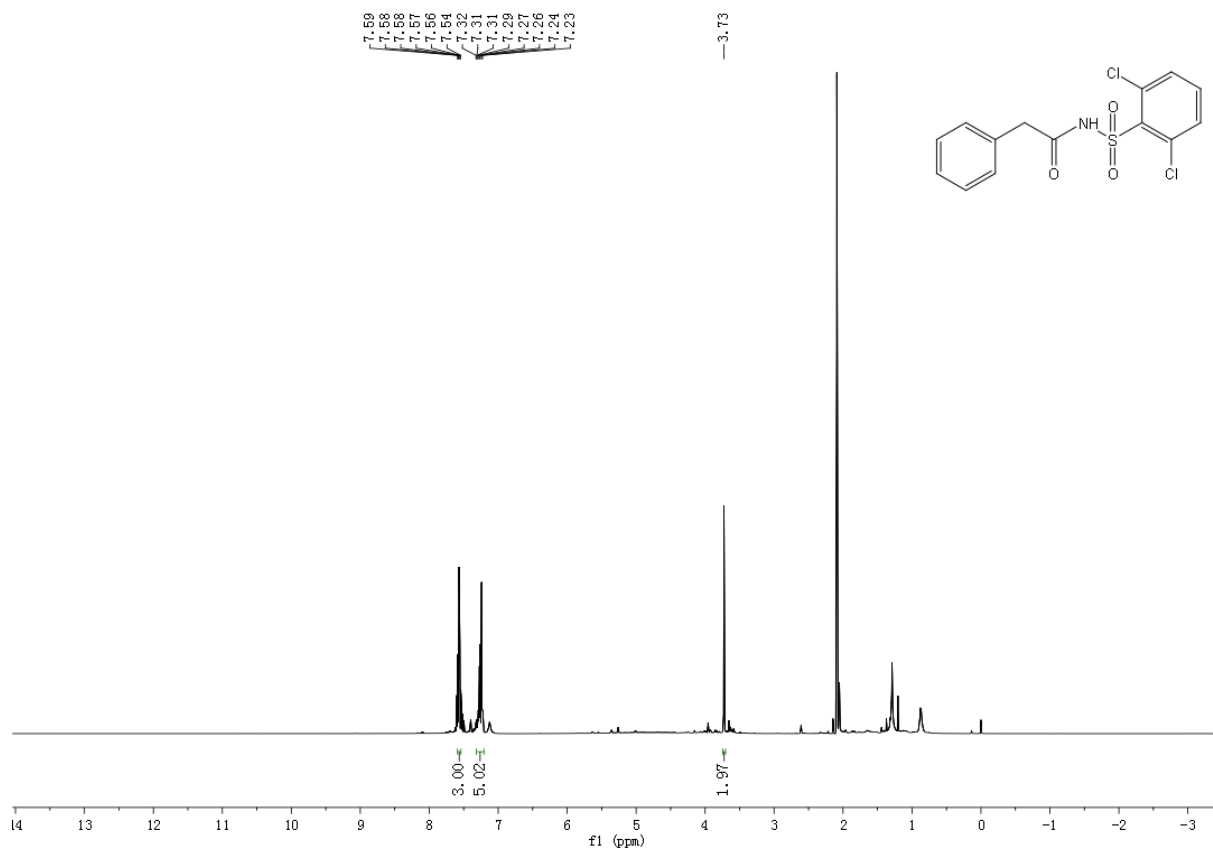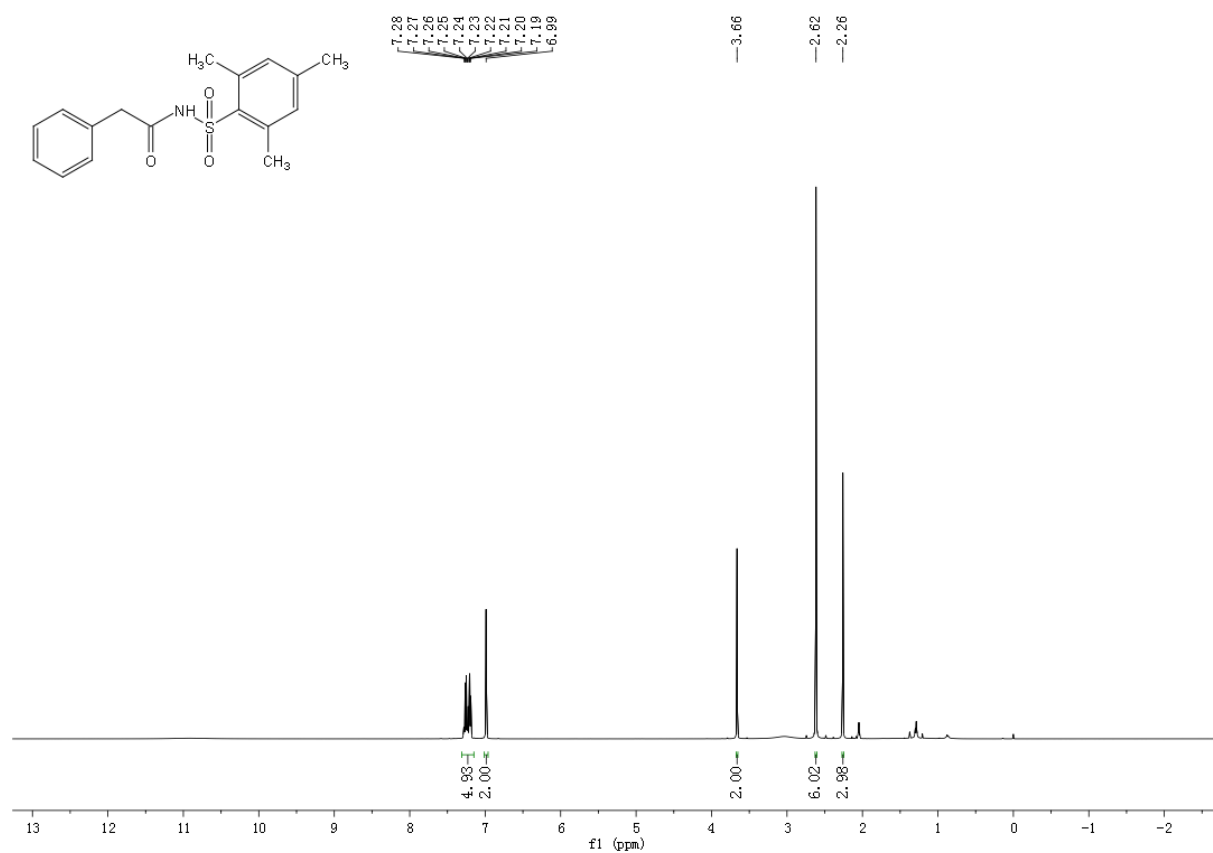

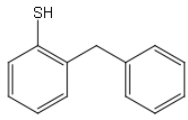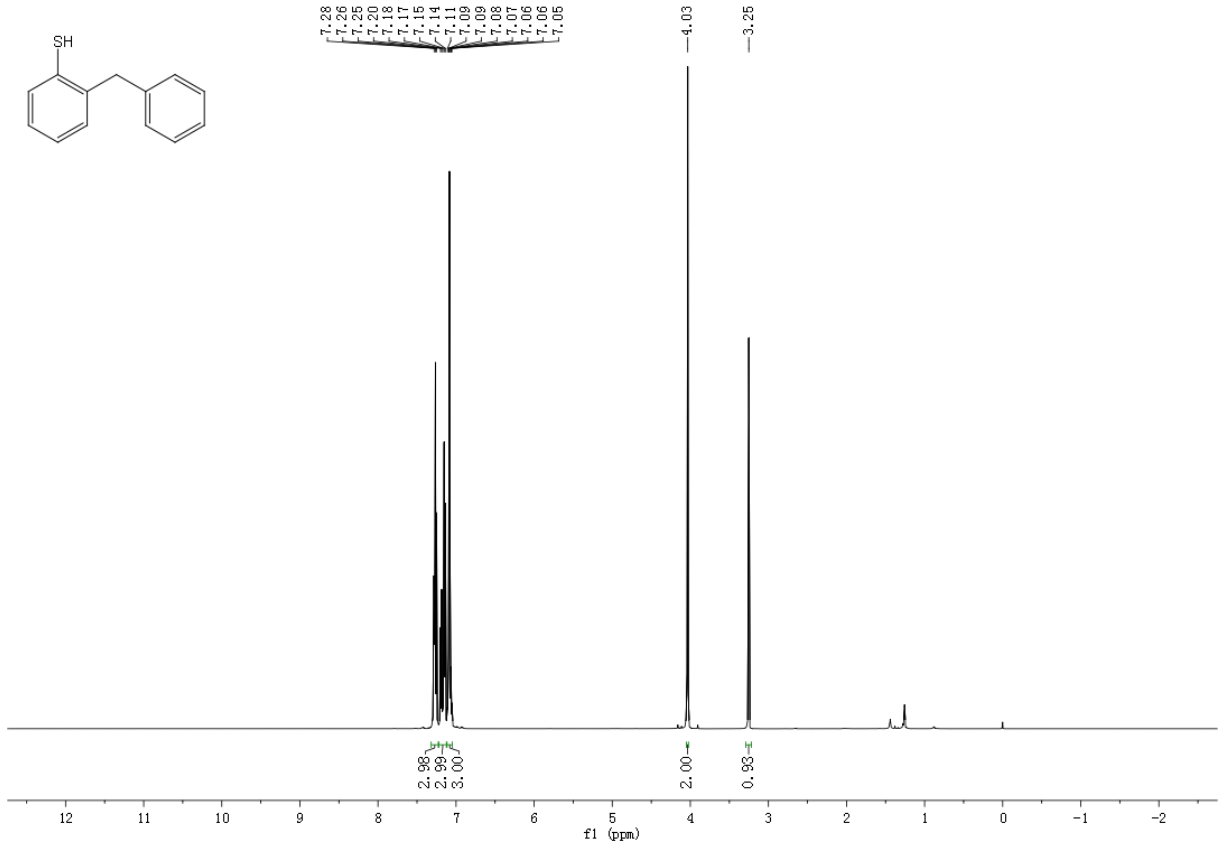

Supplement: c5ob01582k1.pdf [file c5ob01582k1.pdf]
